# Supplementary material for: A Subset of Histone H2B Genes Produces Polyadenylated mRNAs under a Variety of Cellular Conditions
Source: PubMed Central journal article supplement (PMC3661734; doi:10.1371/journal.pone.0063745), 2013-05-22

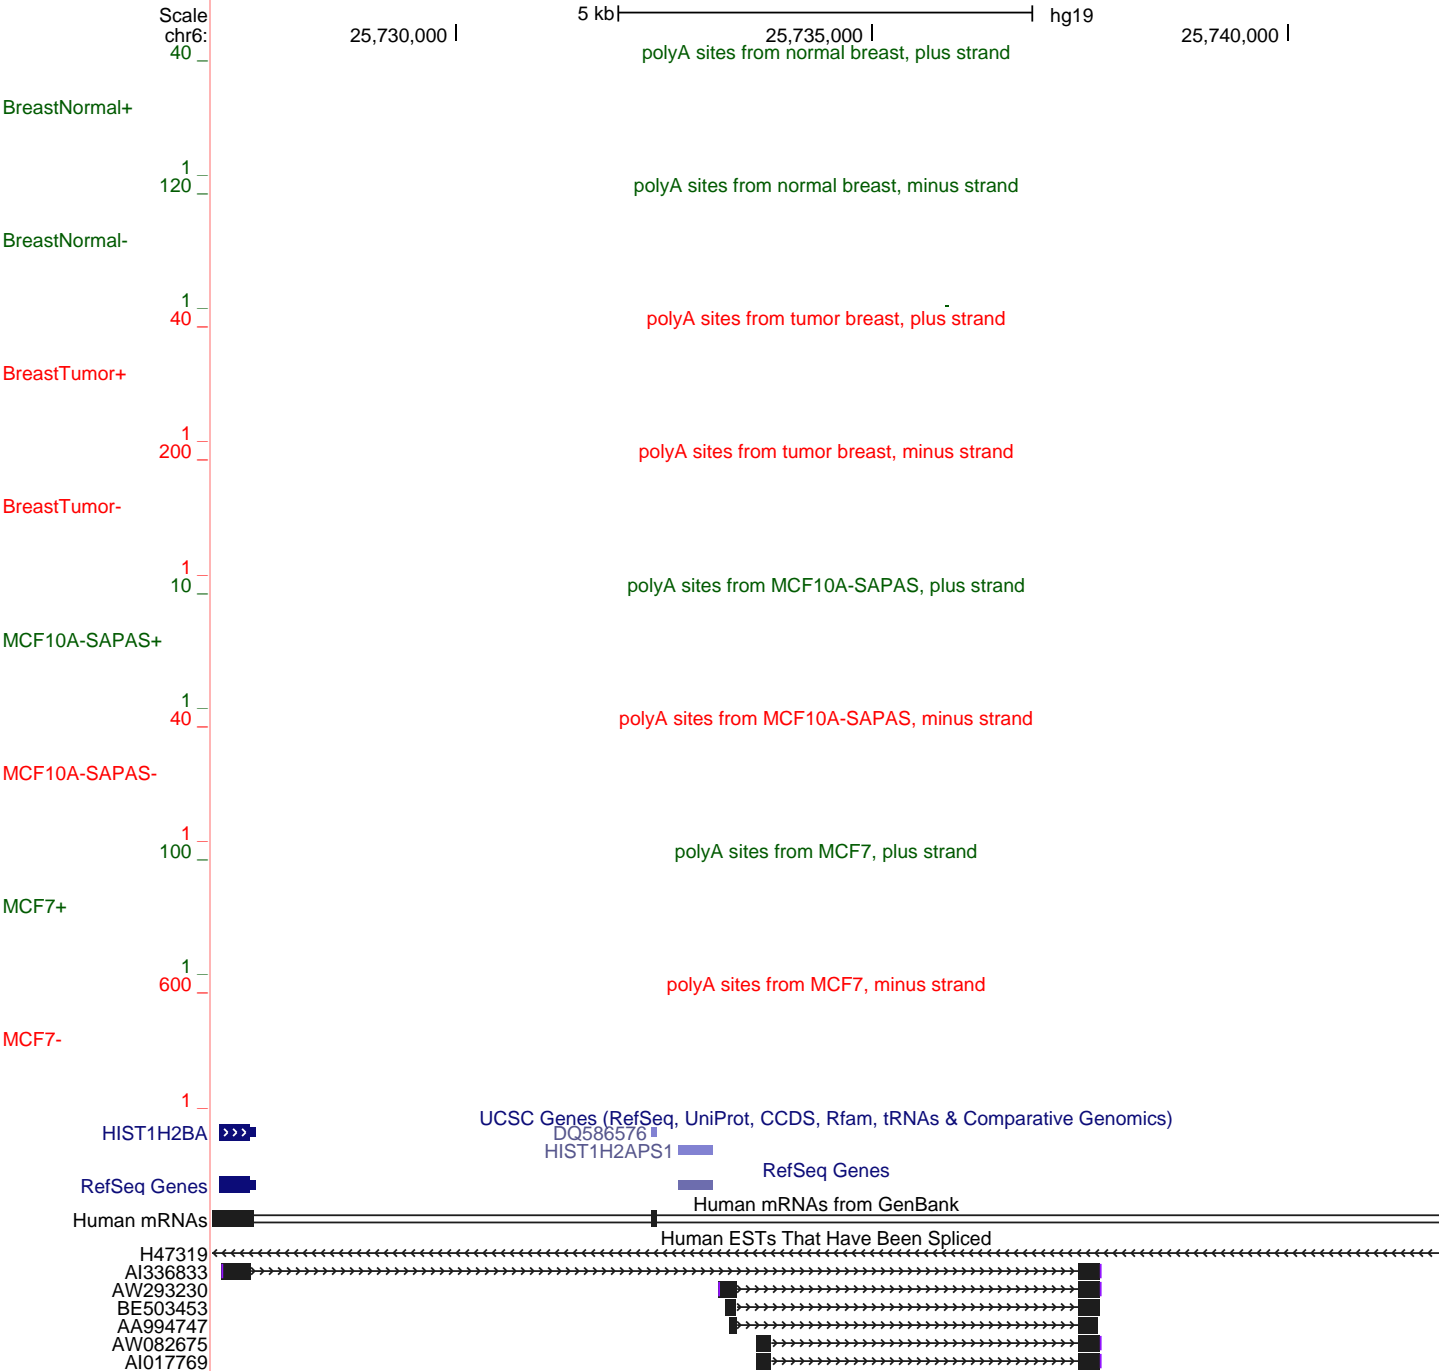

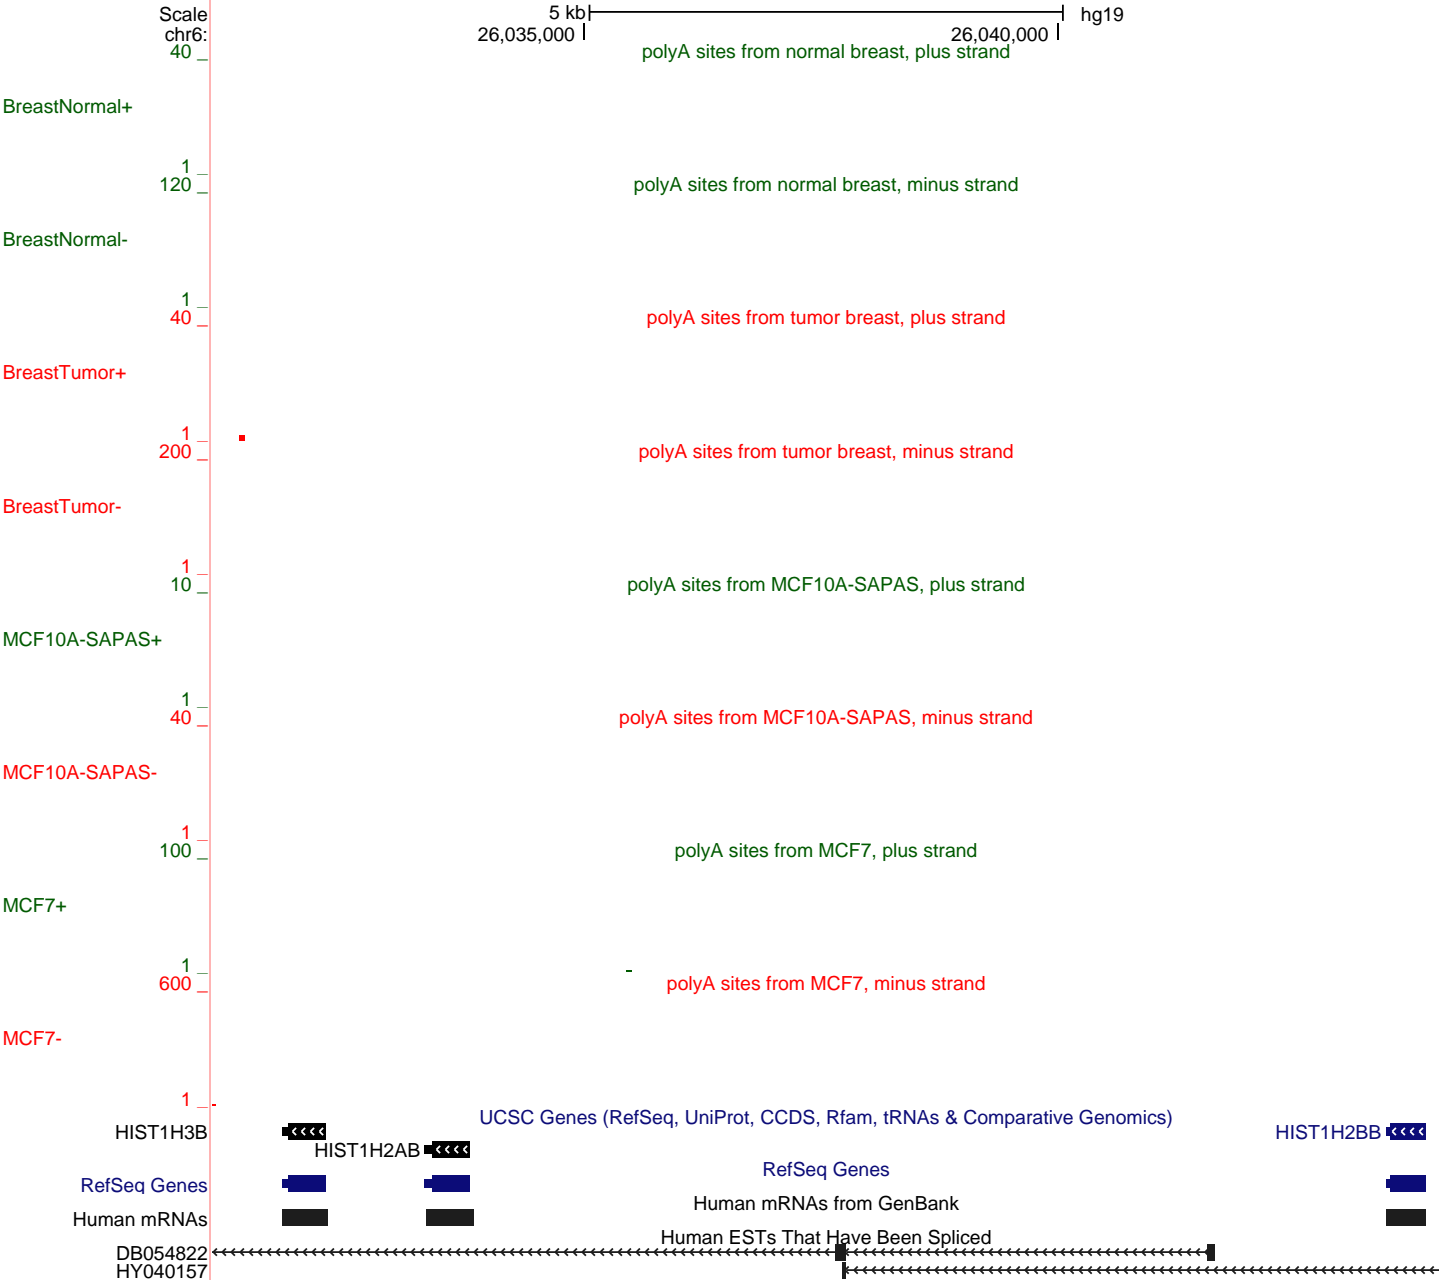

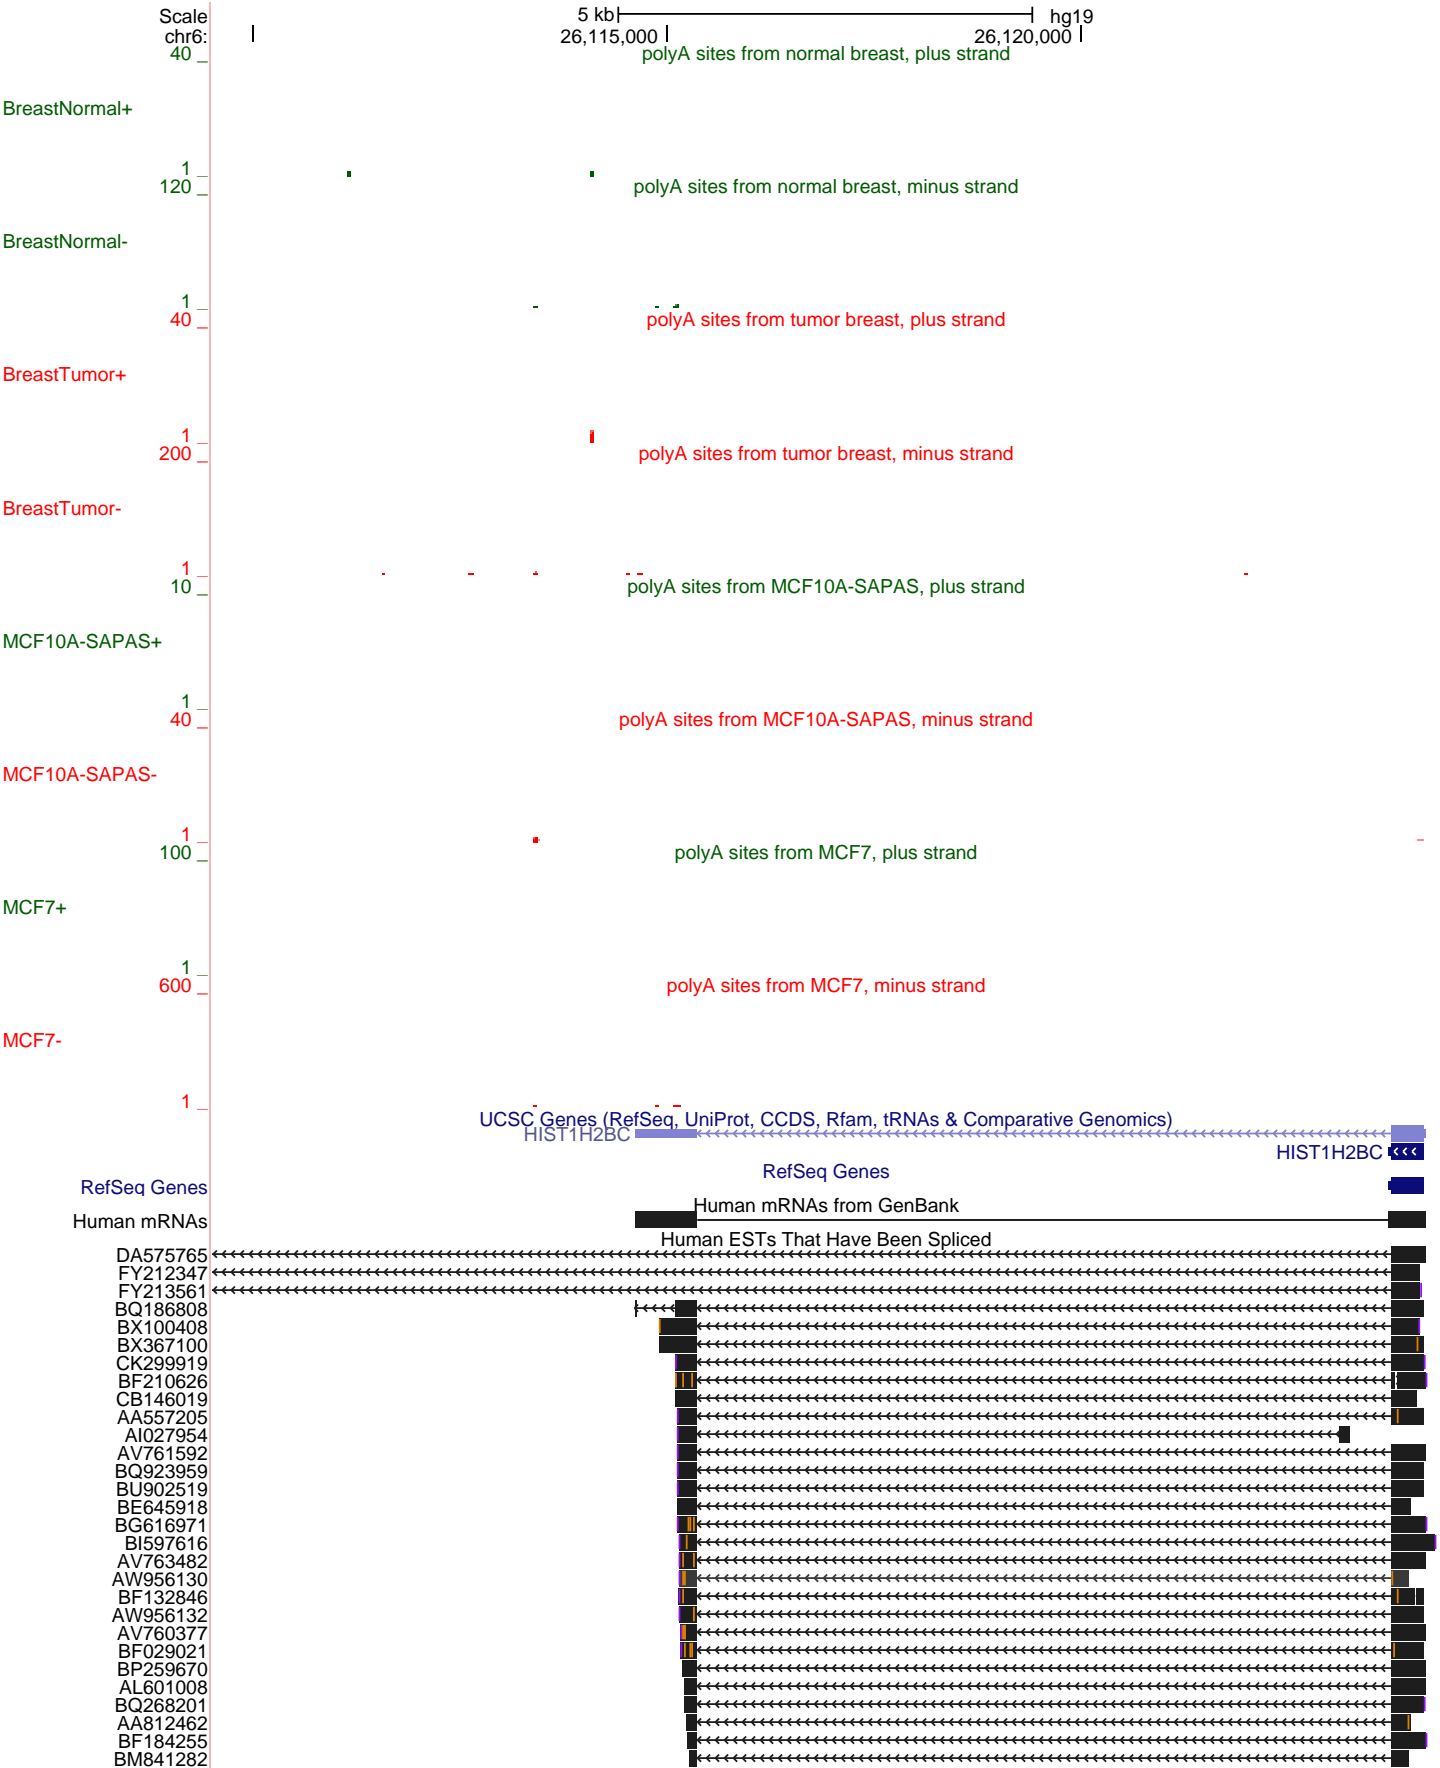

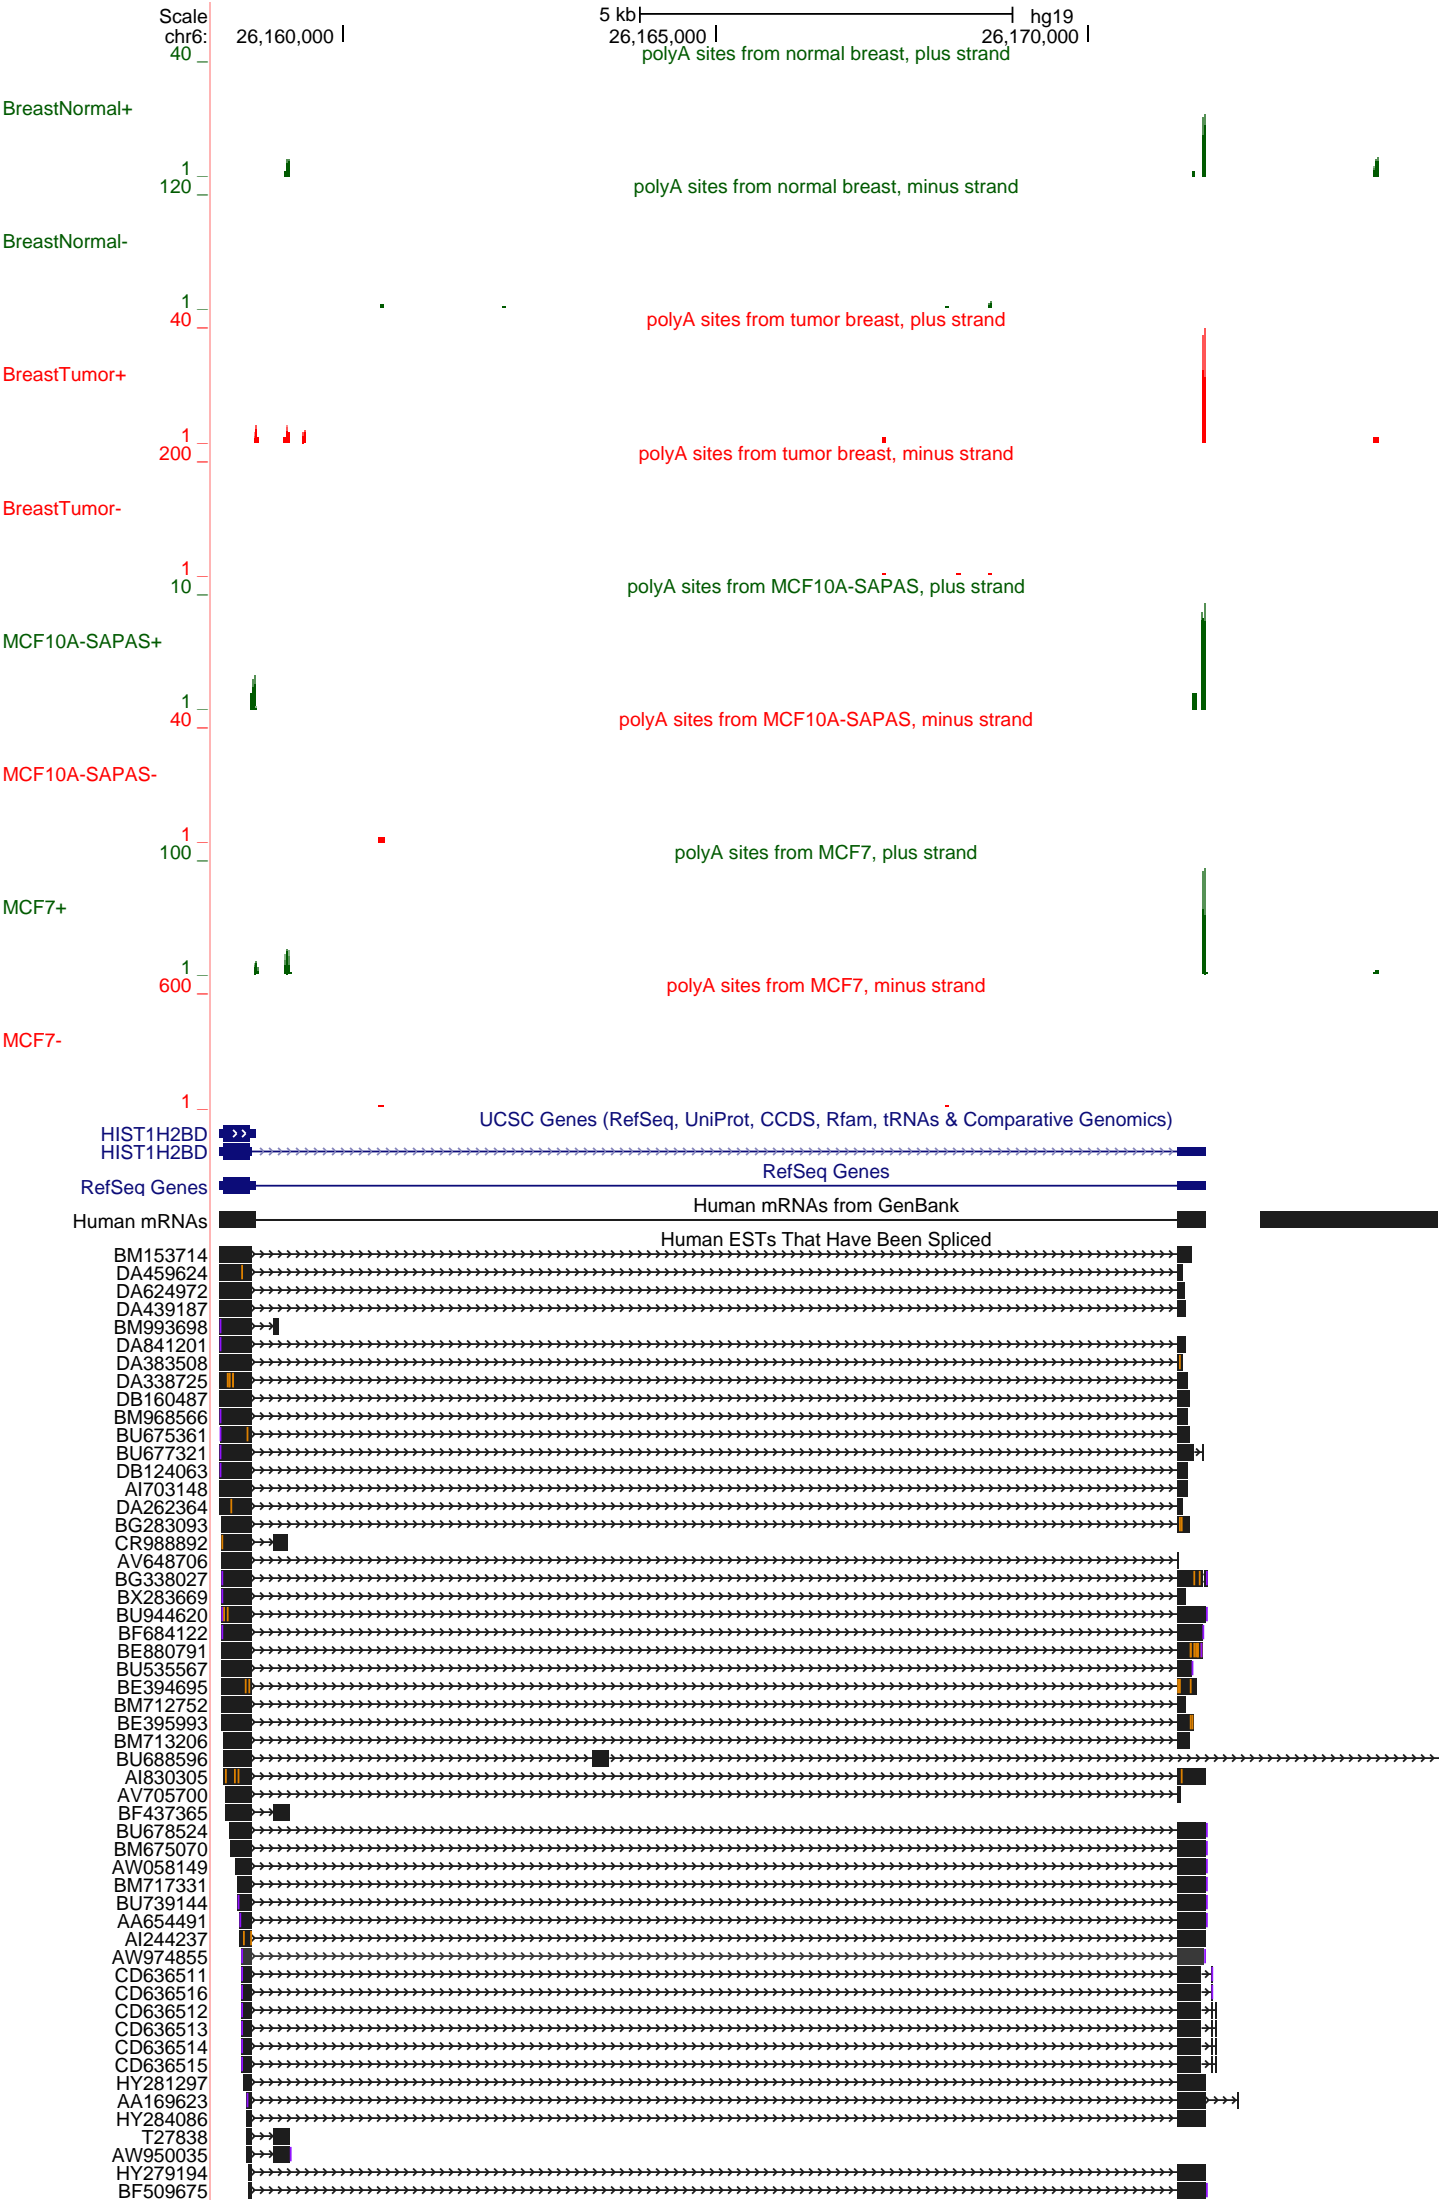

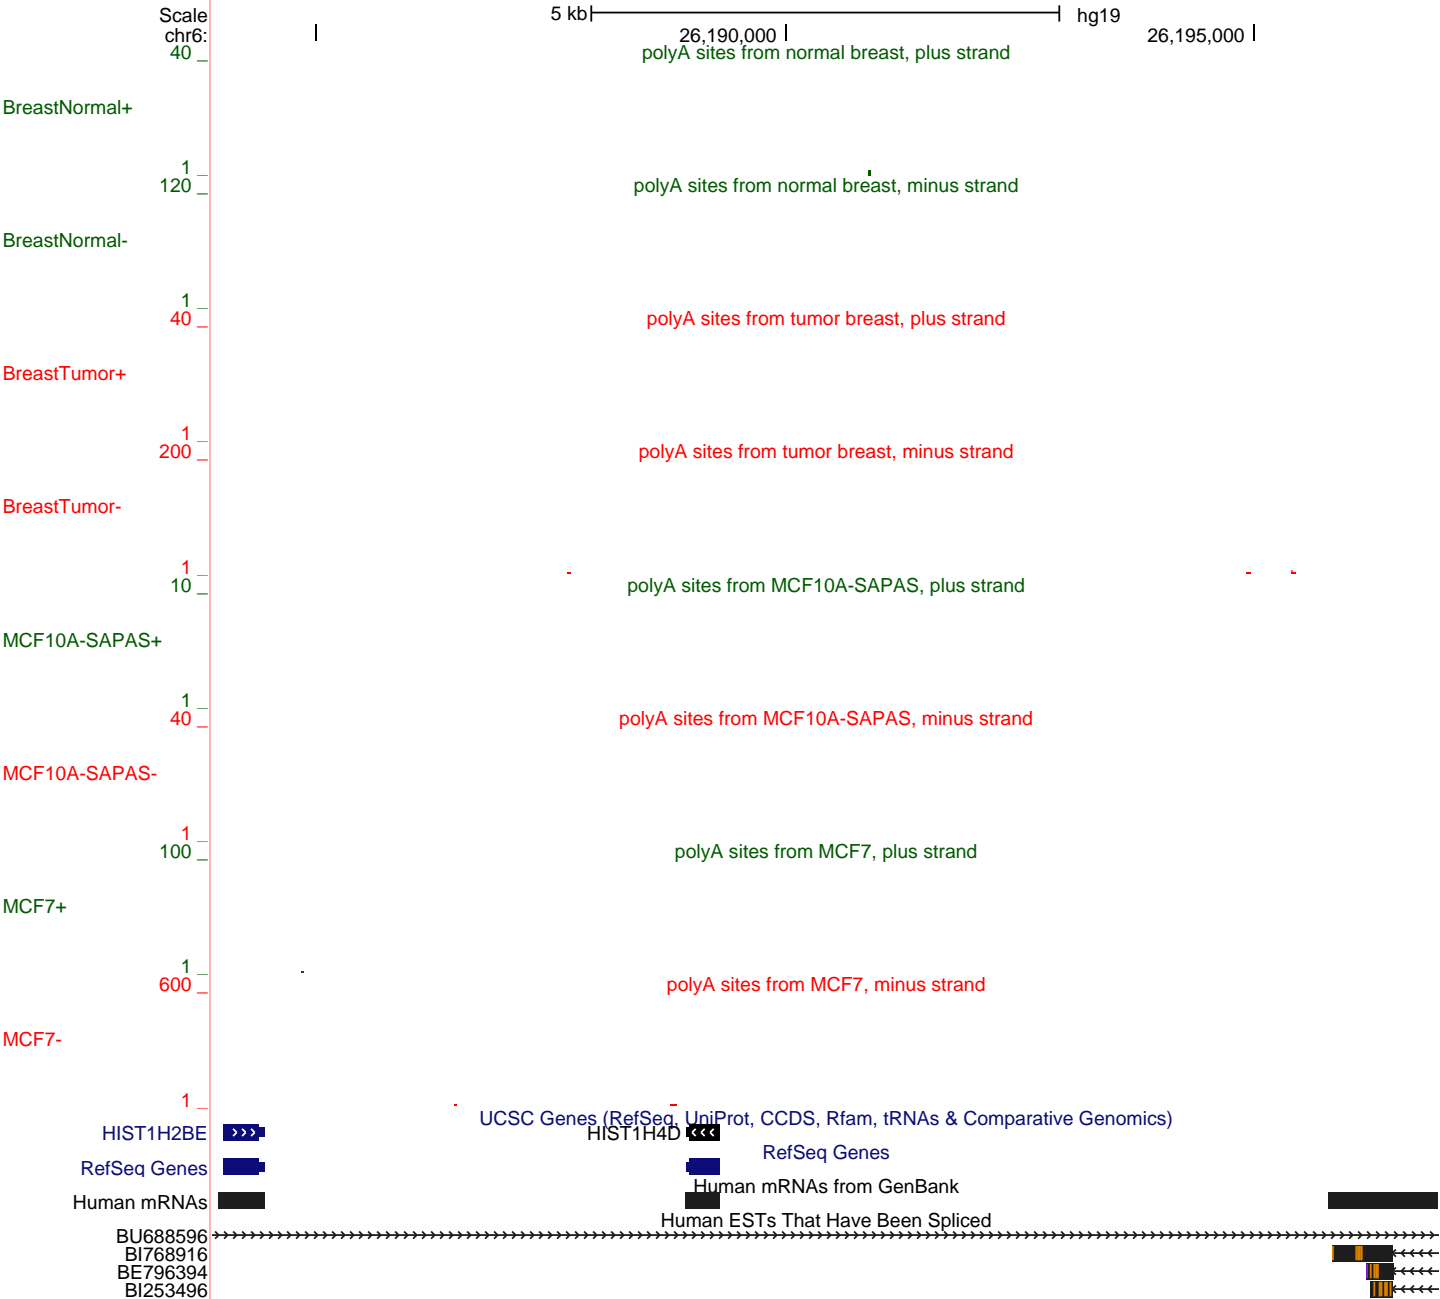

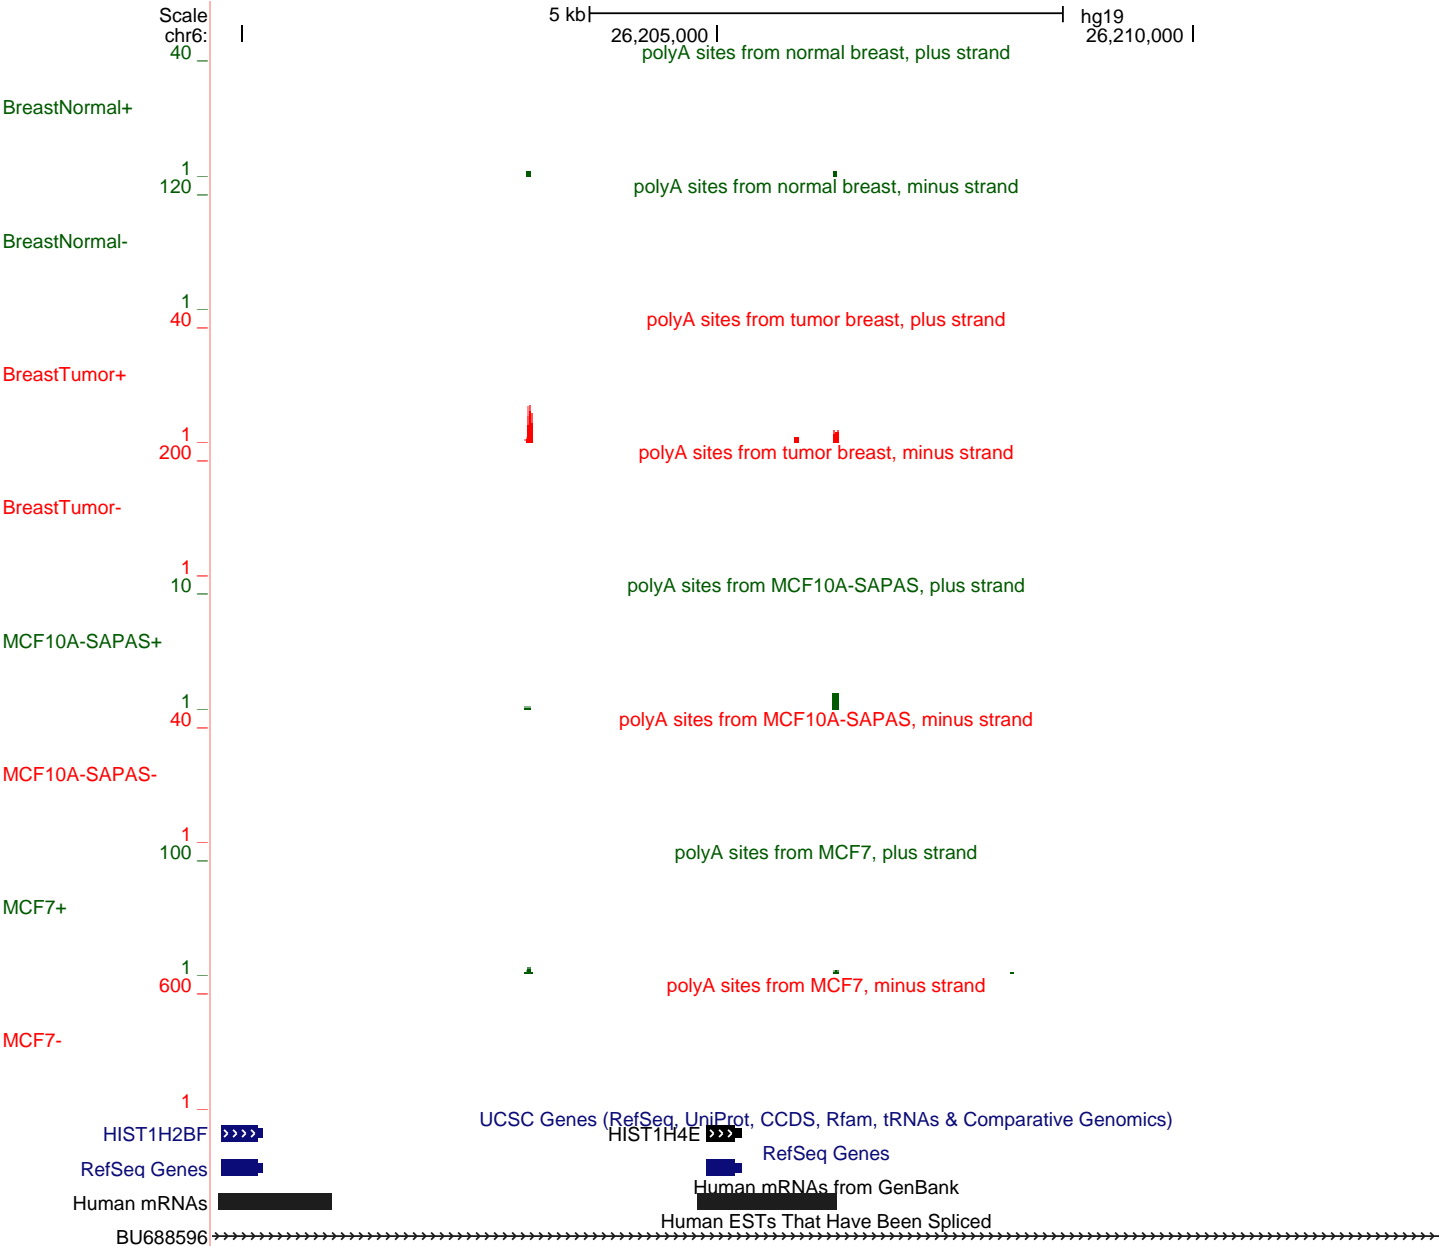

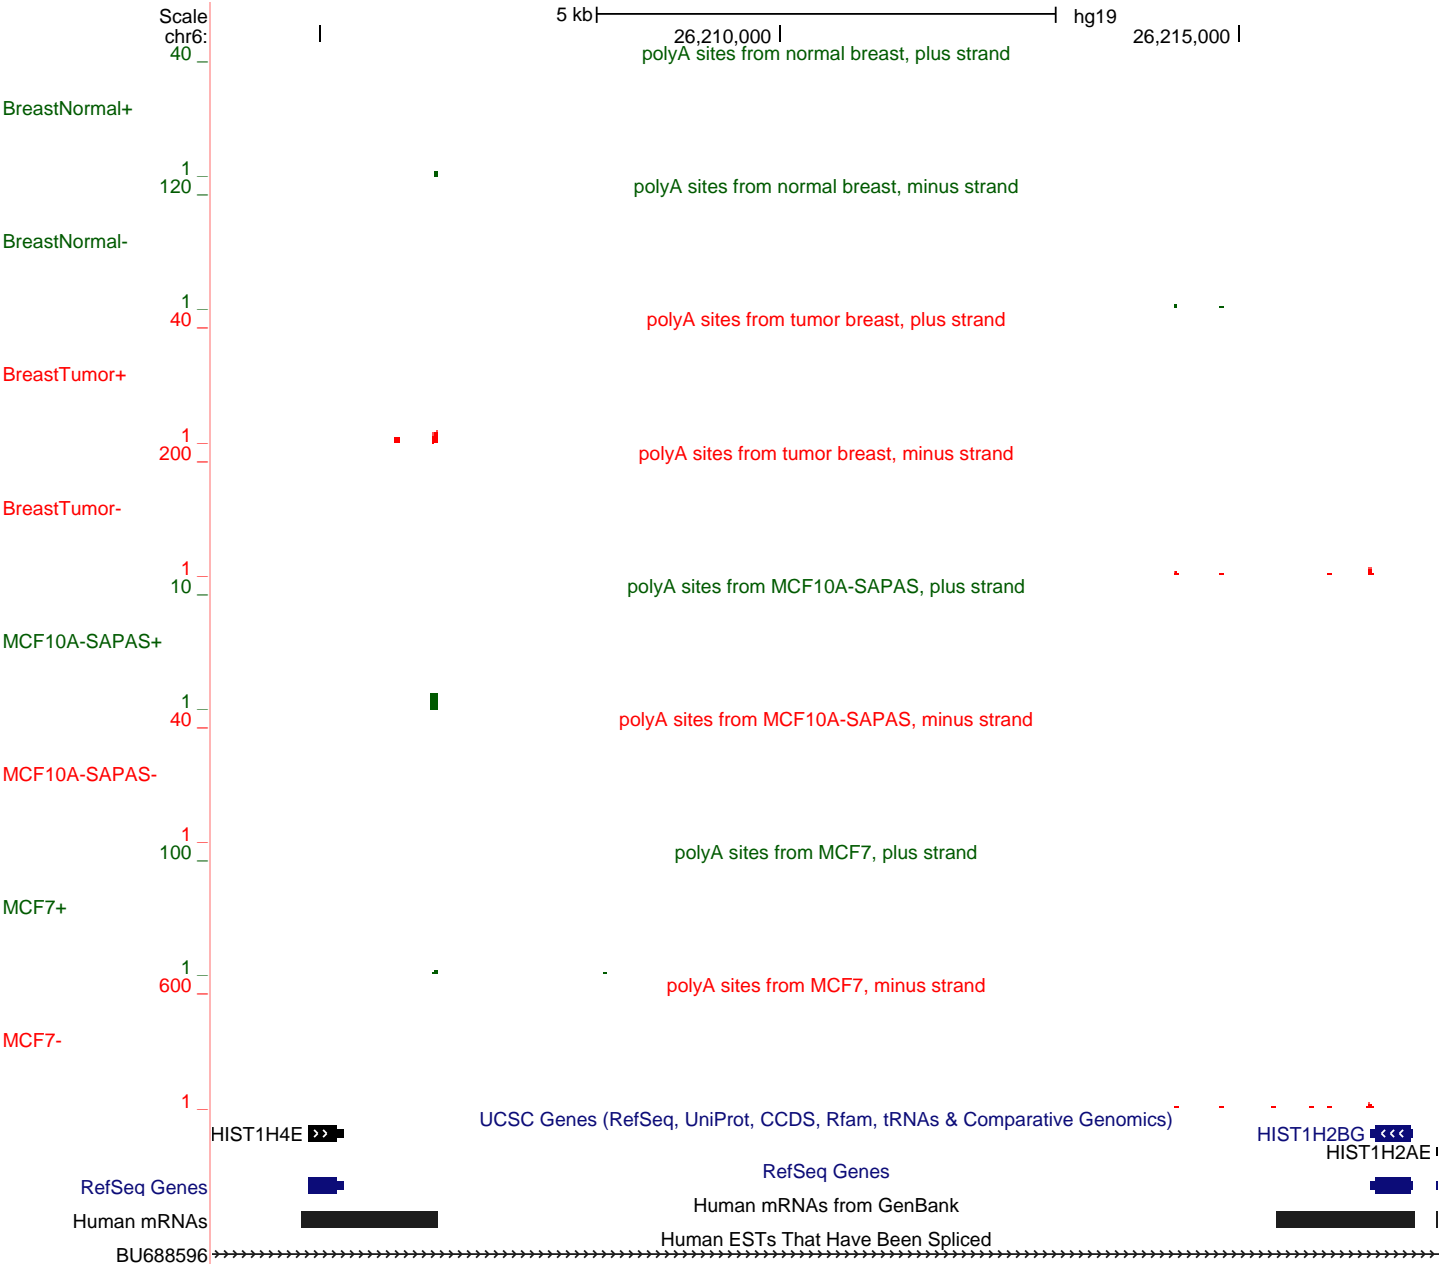

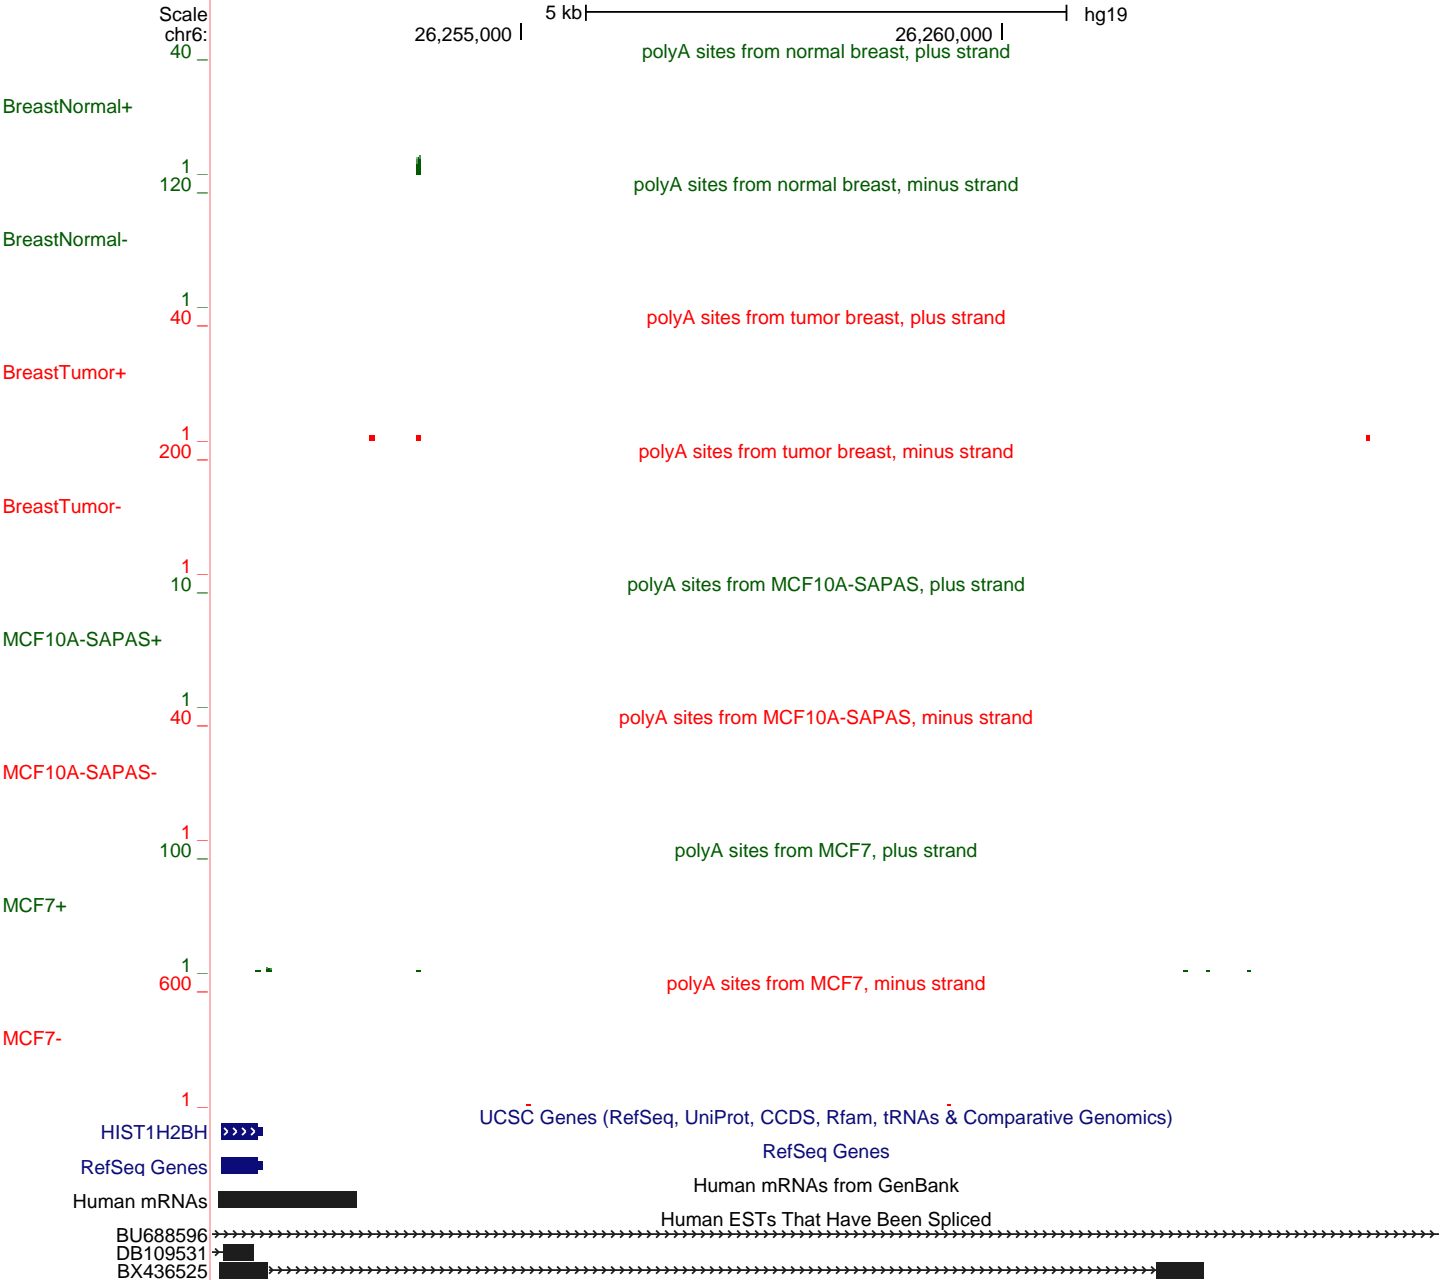



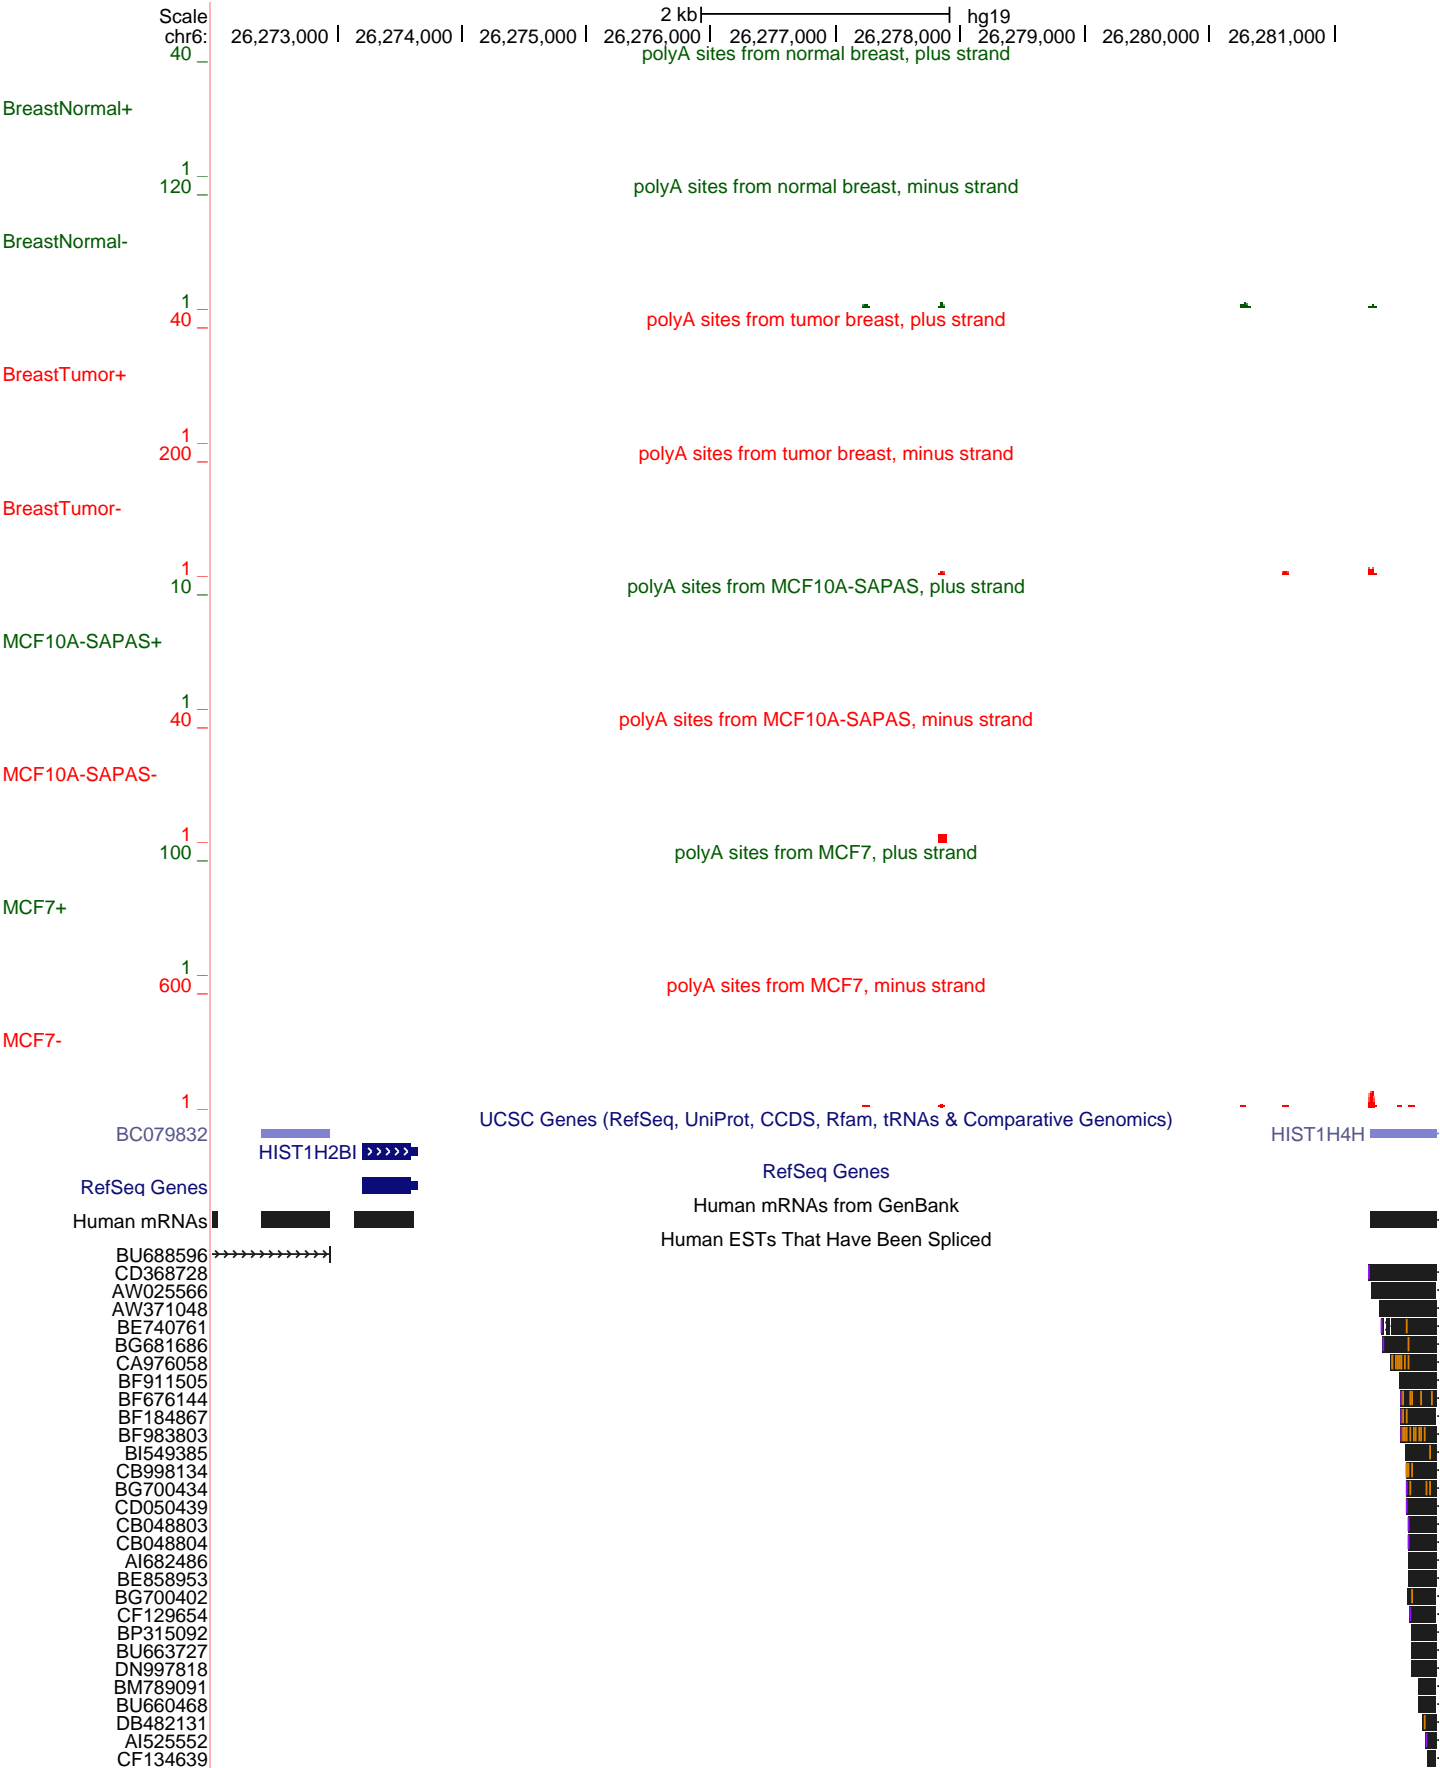

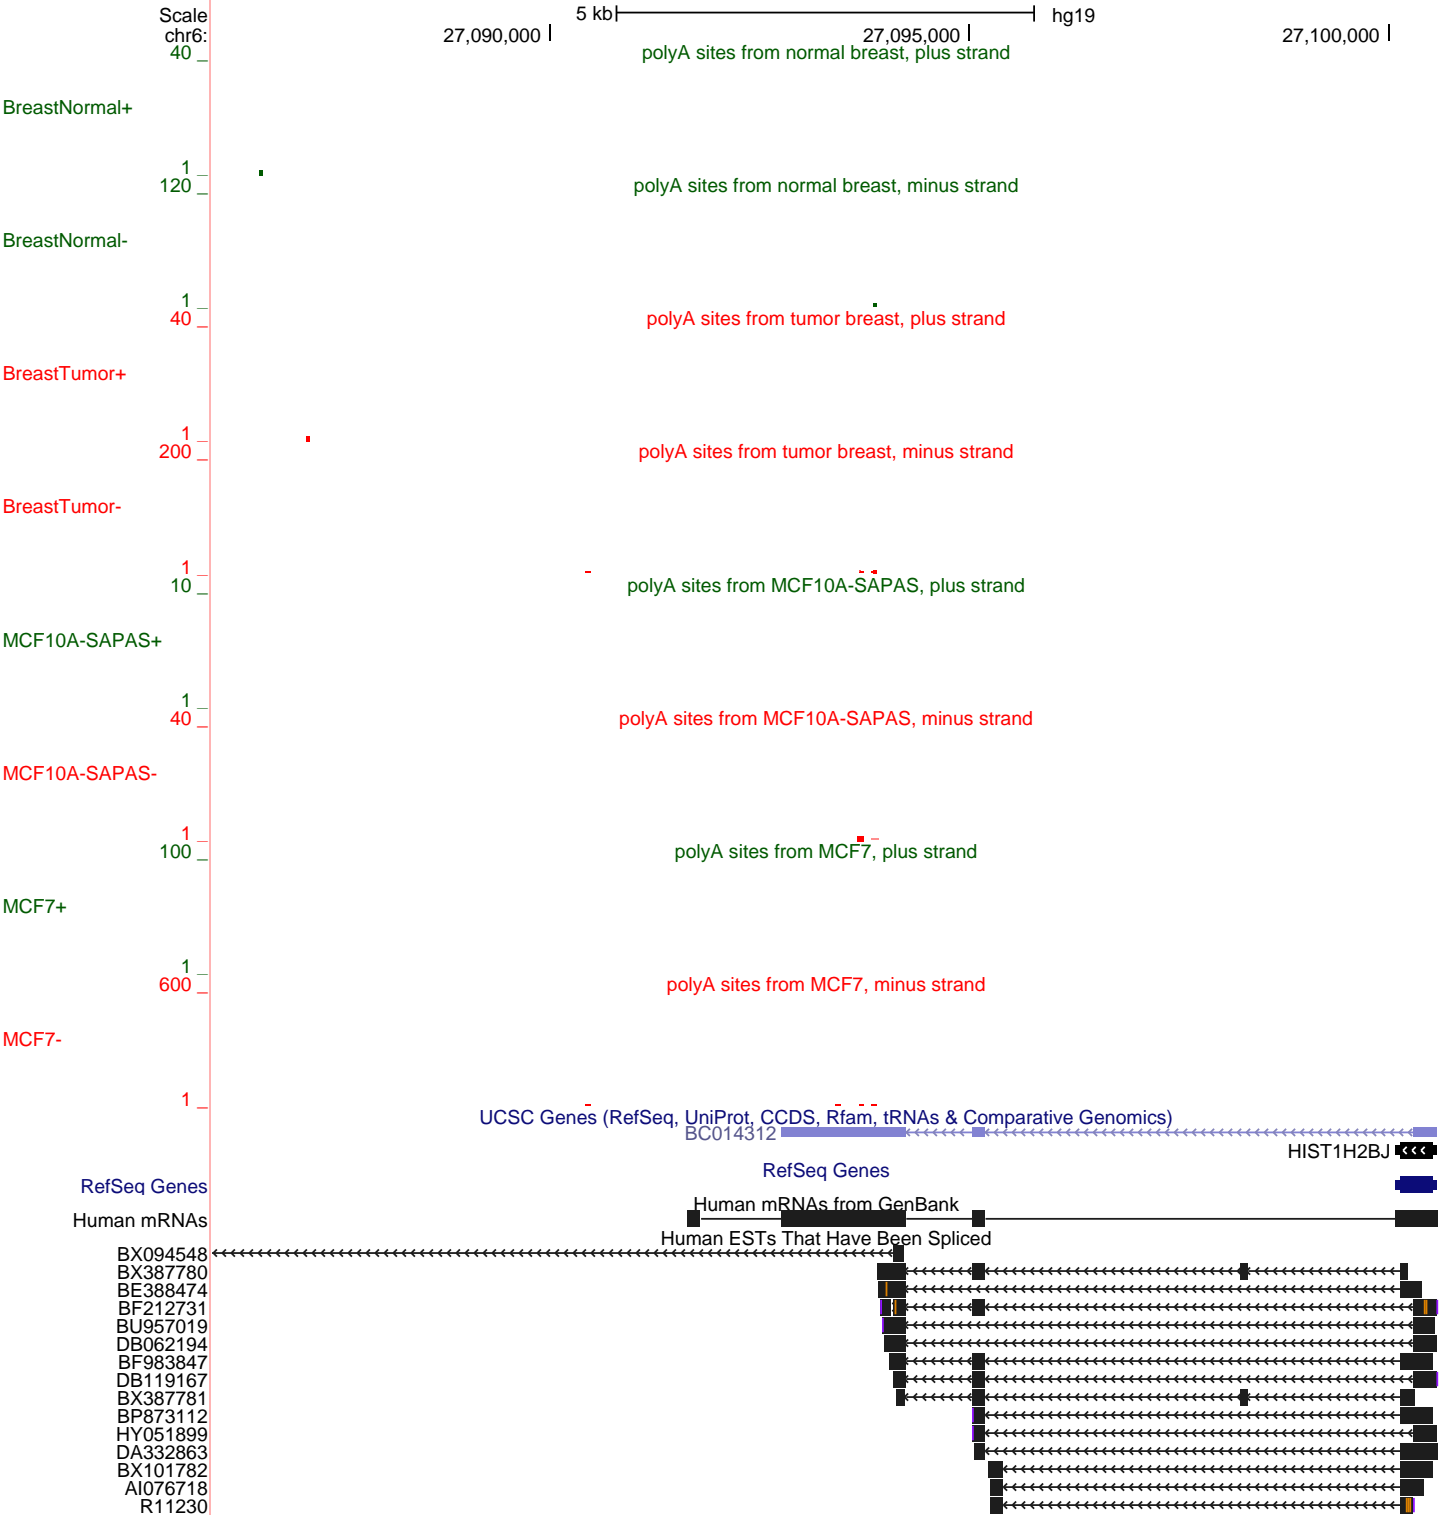

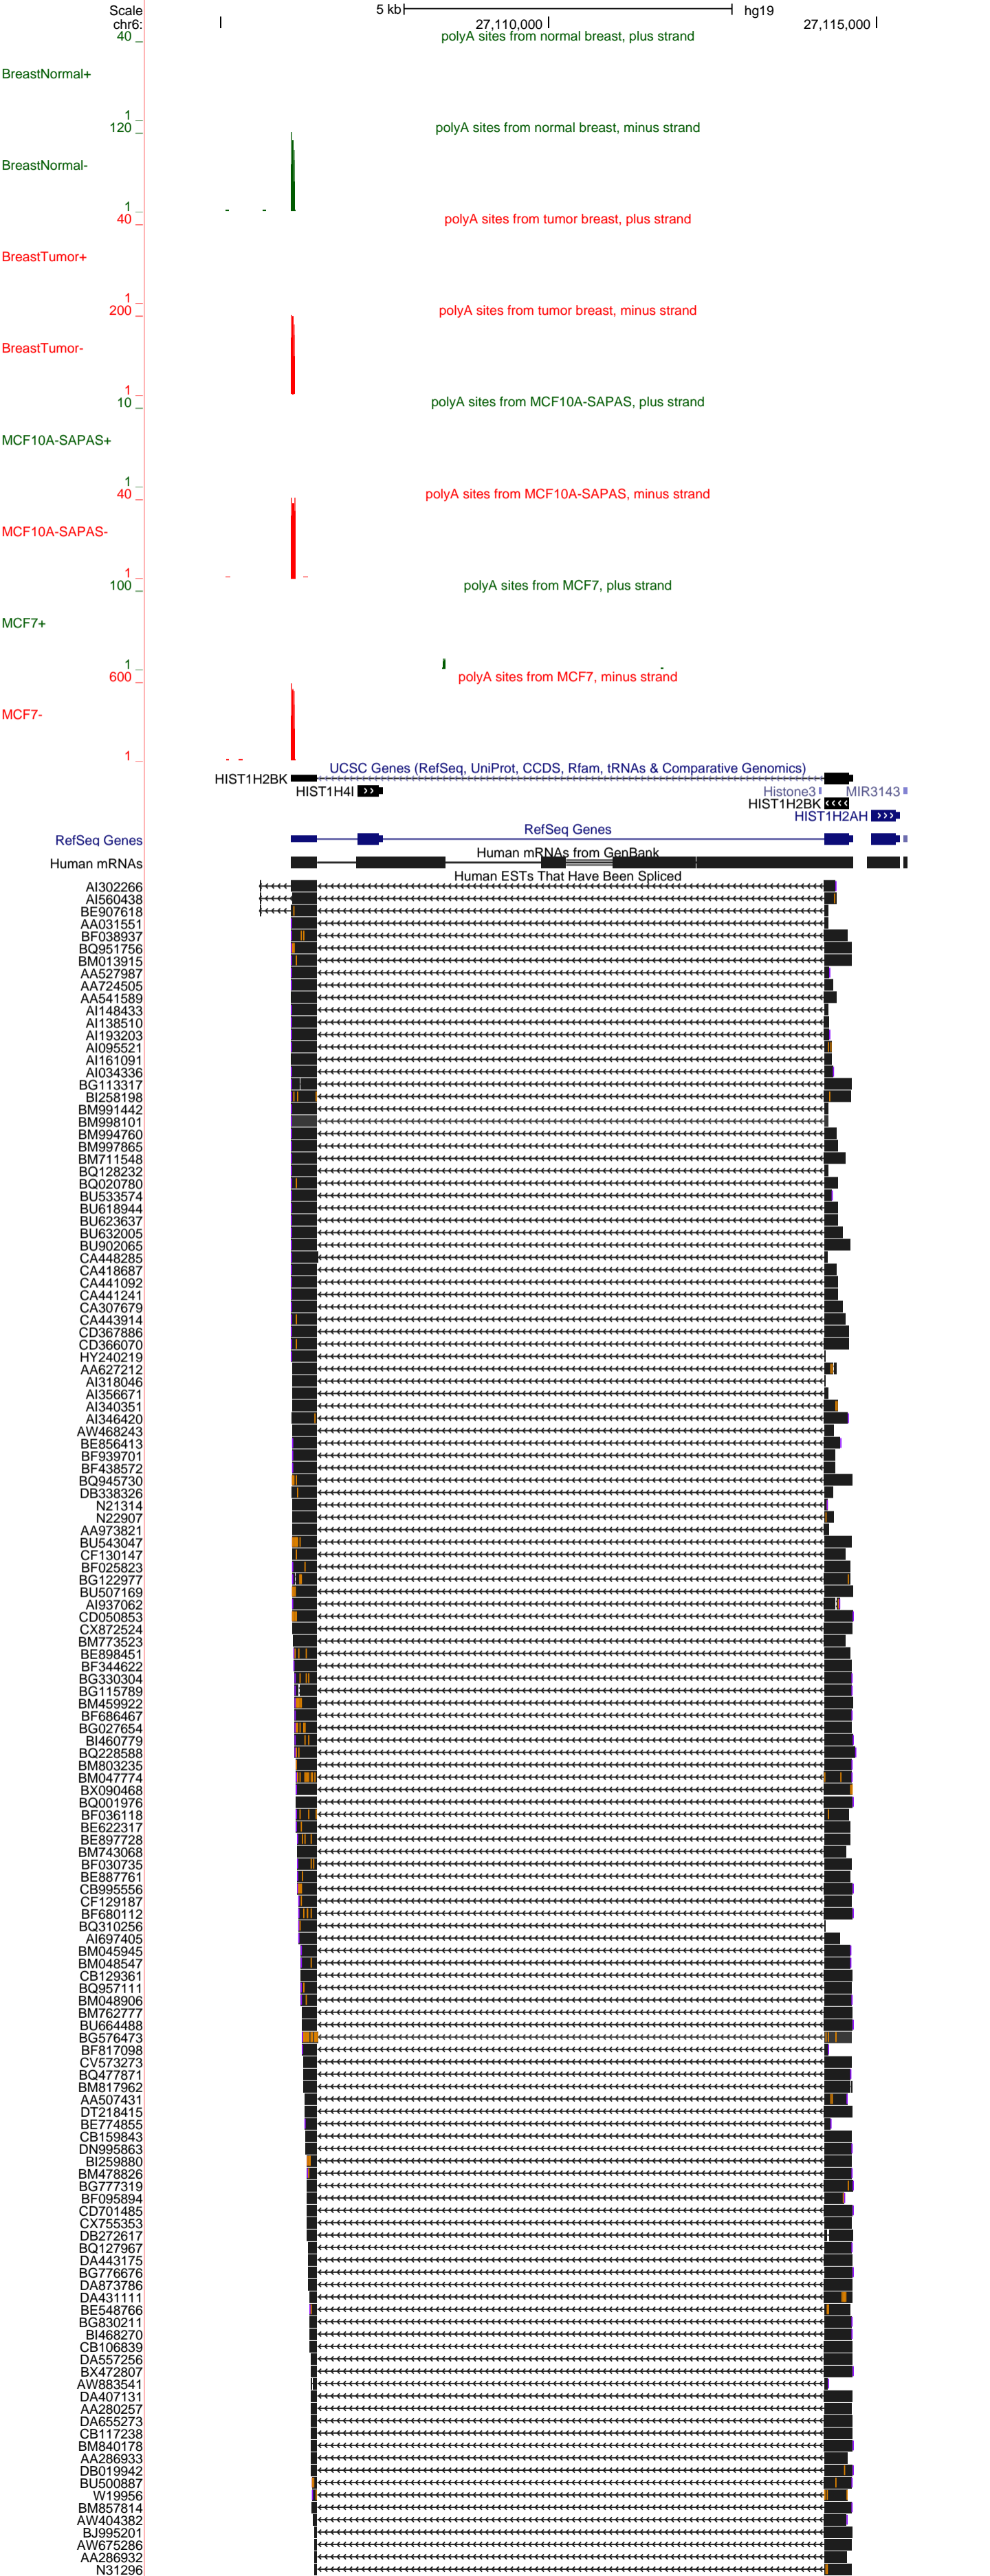

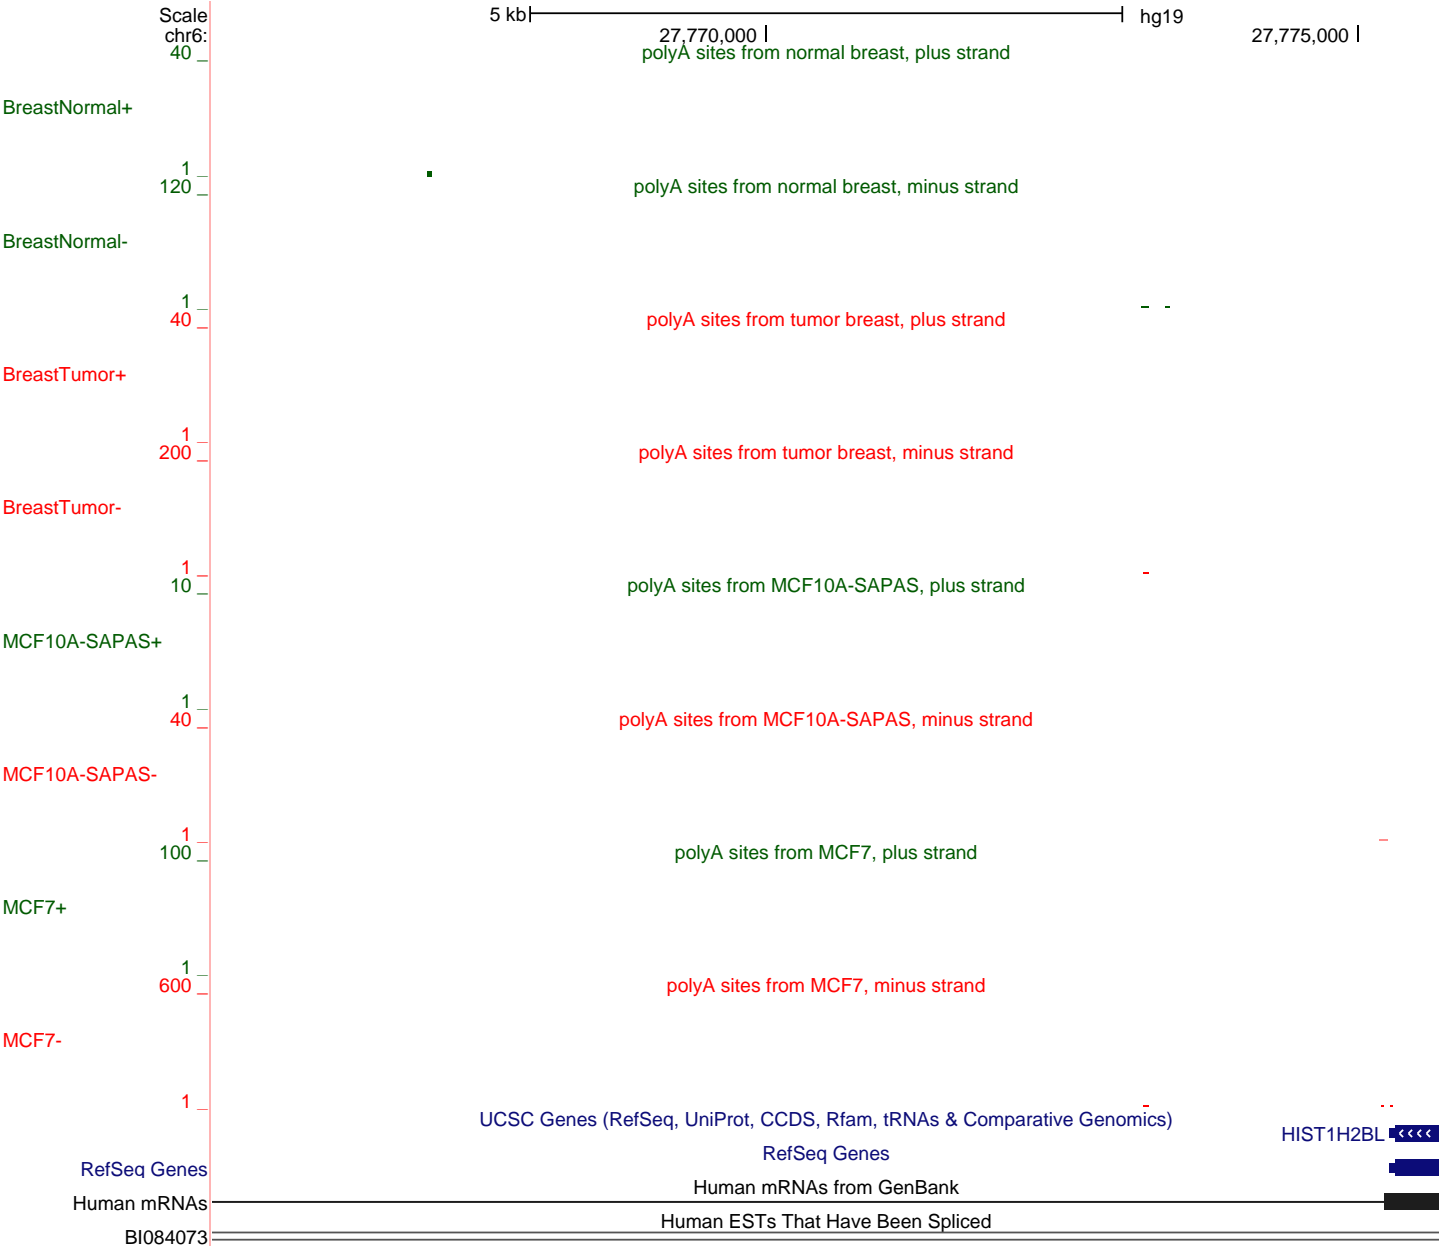

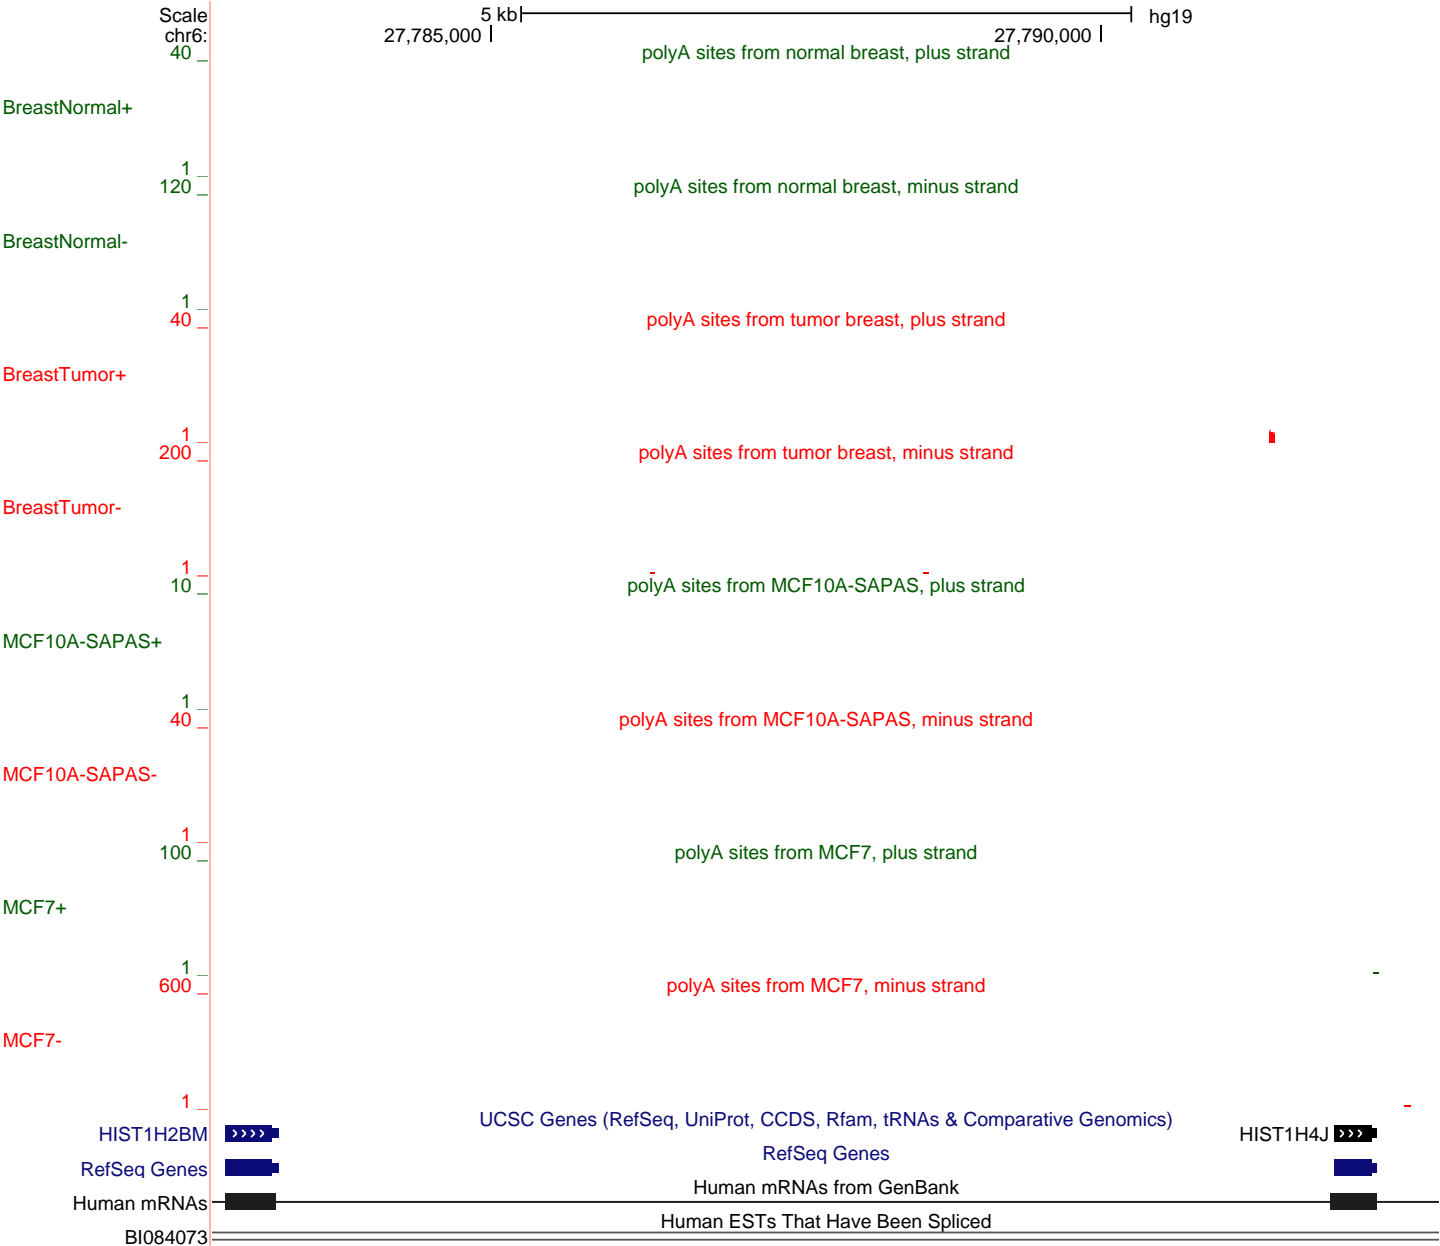

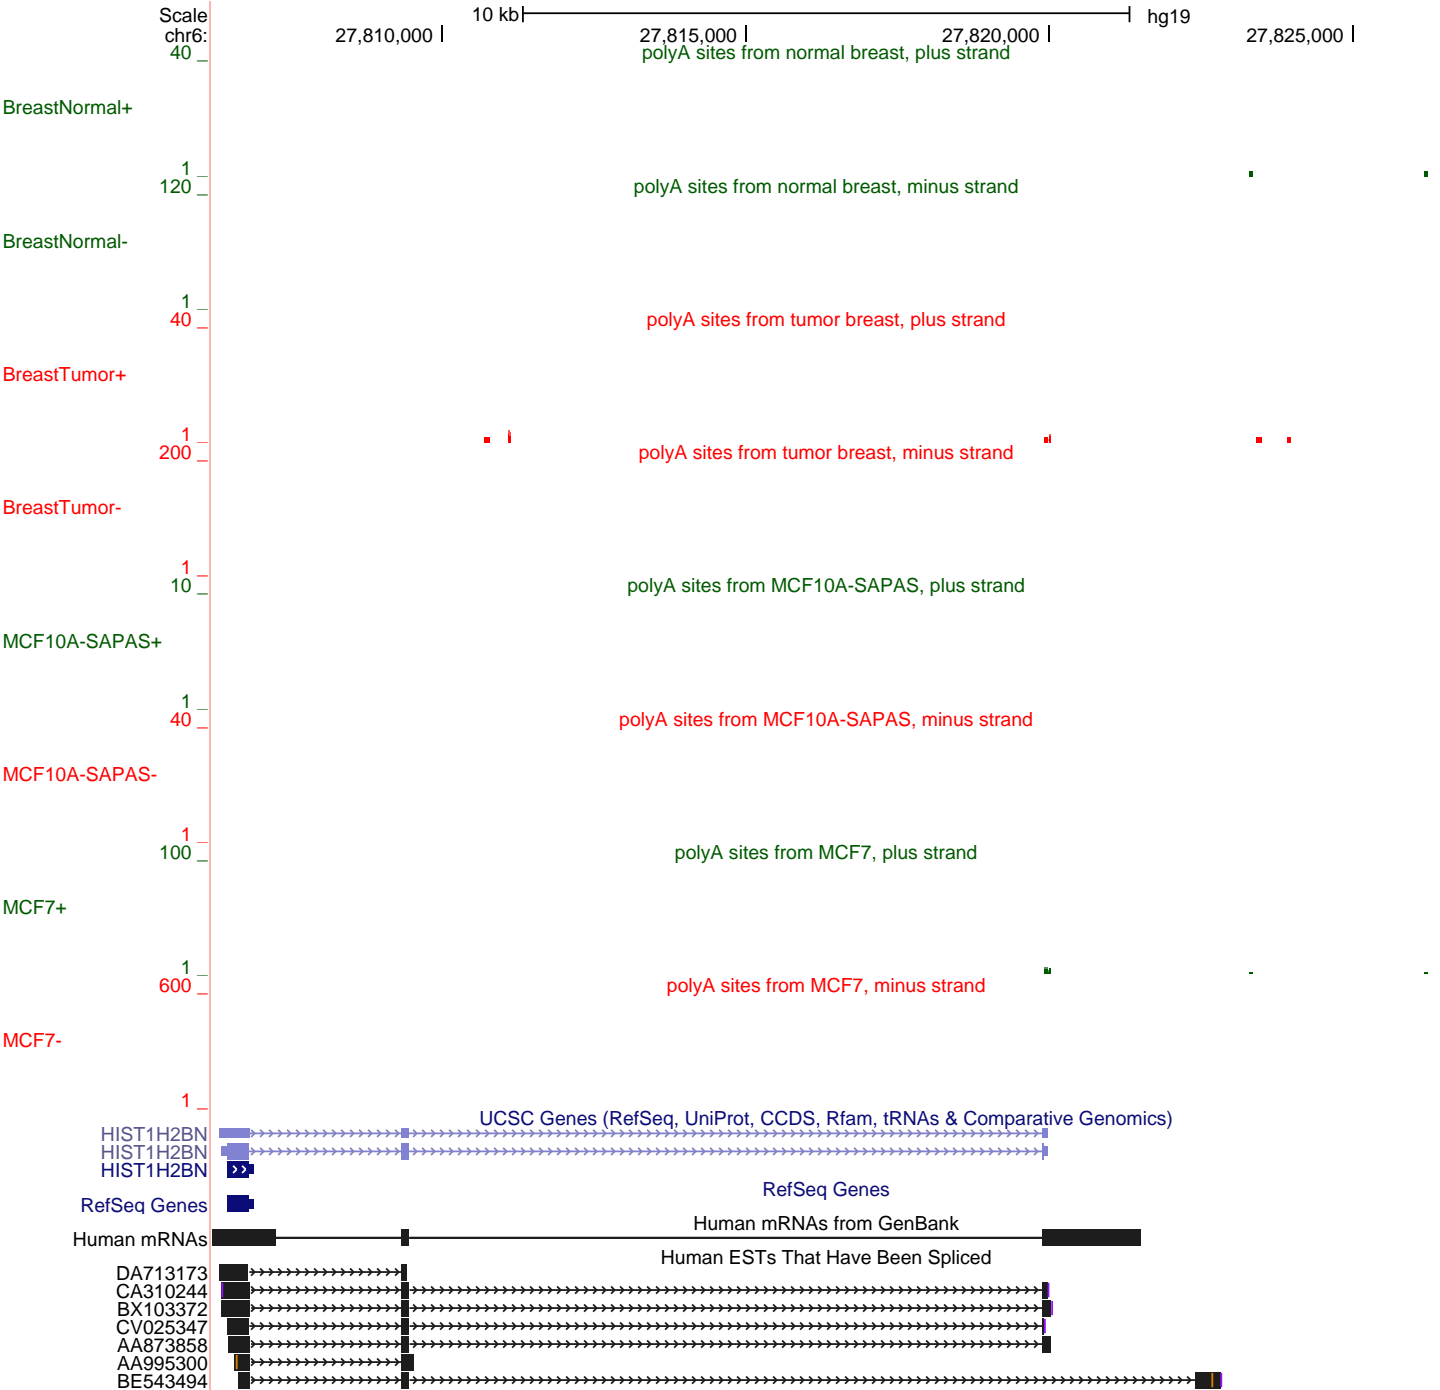

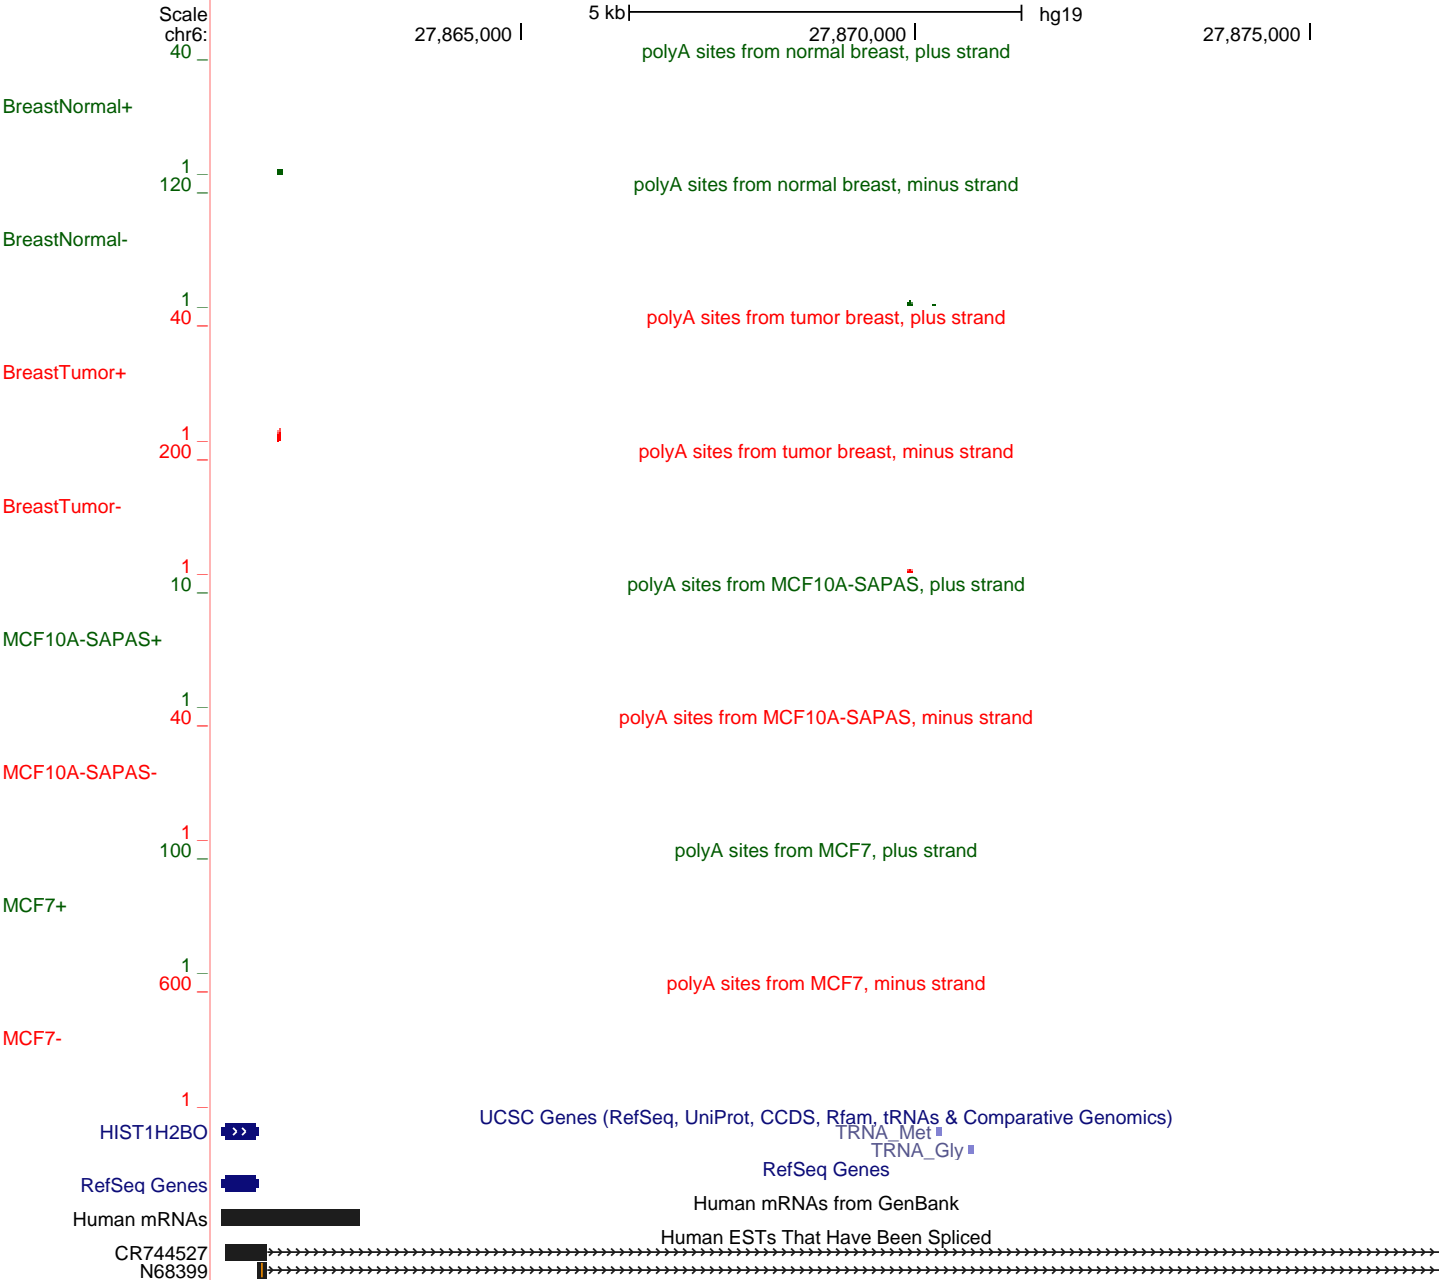

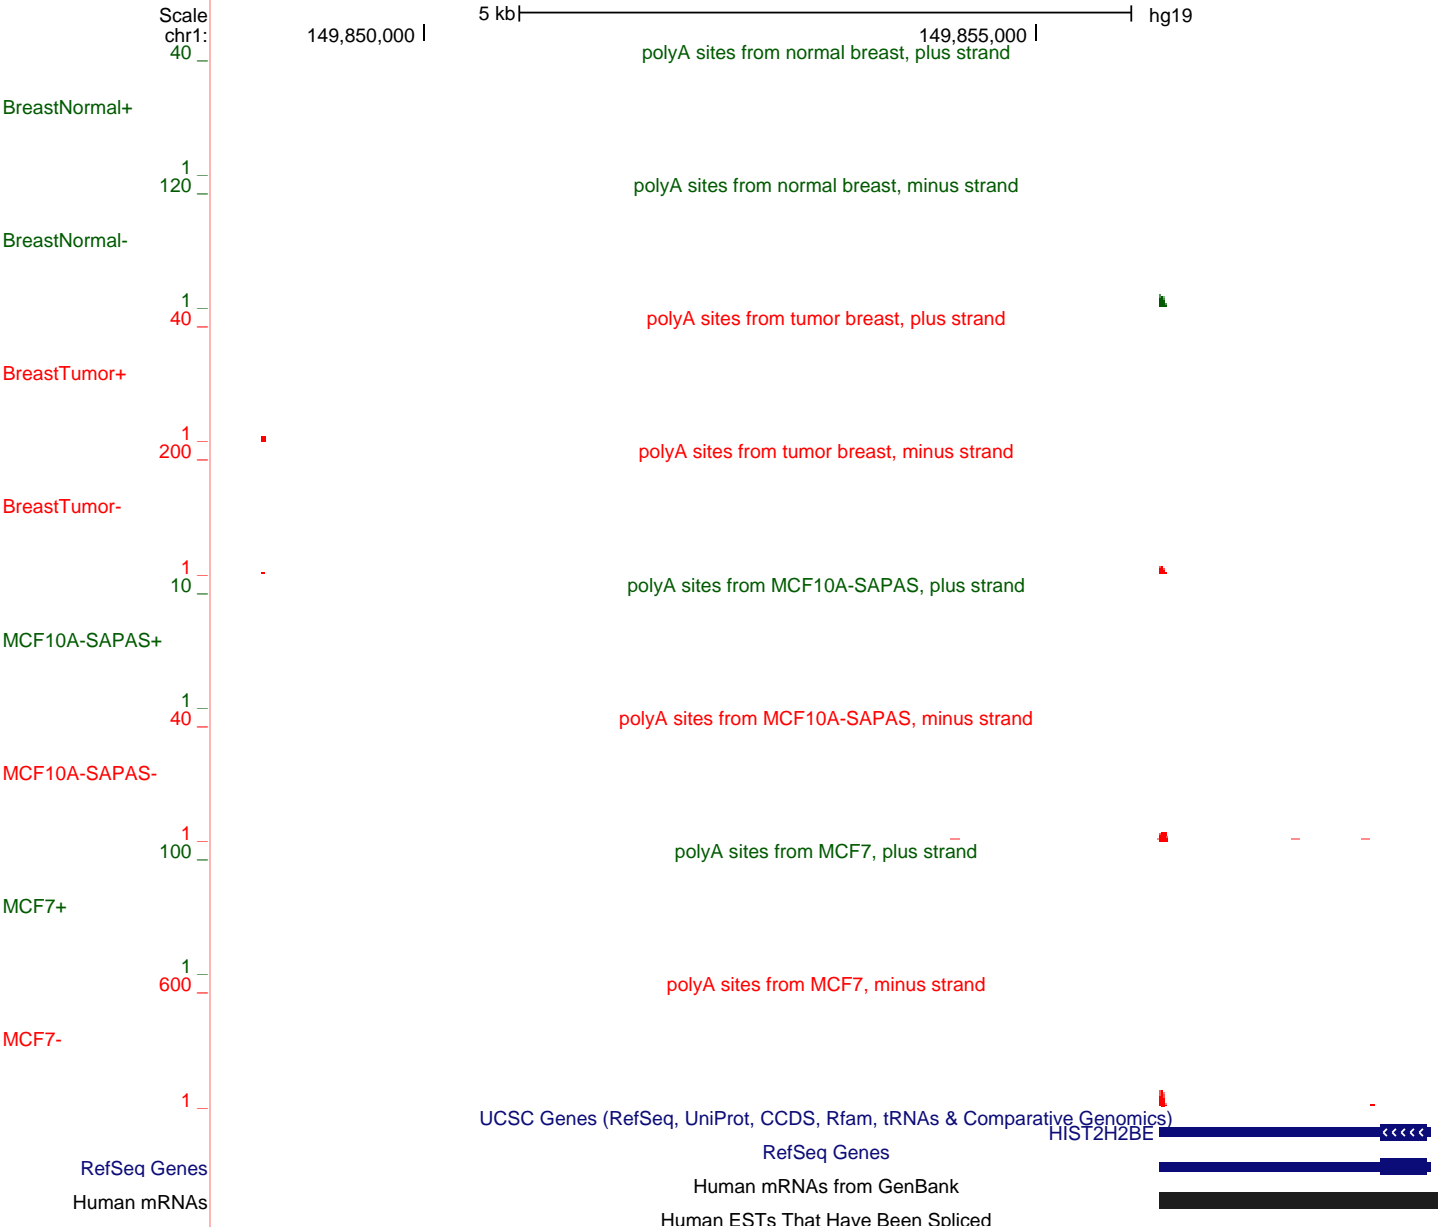



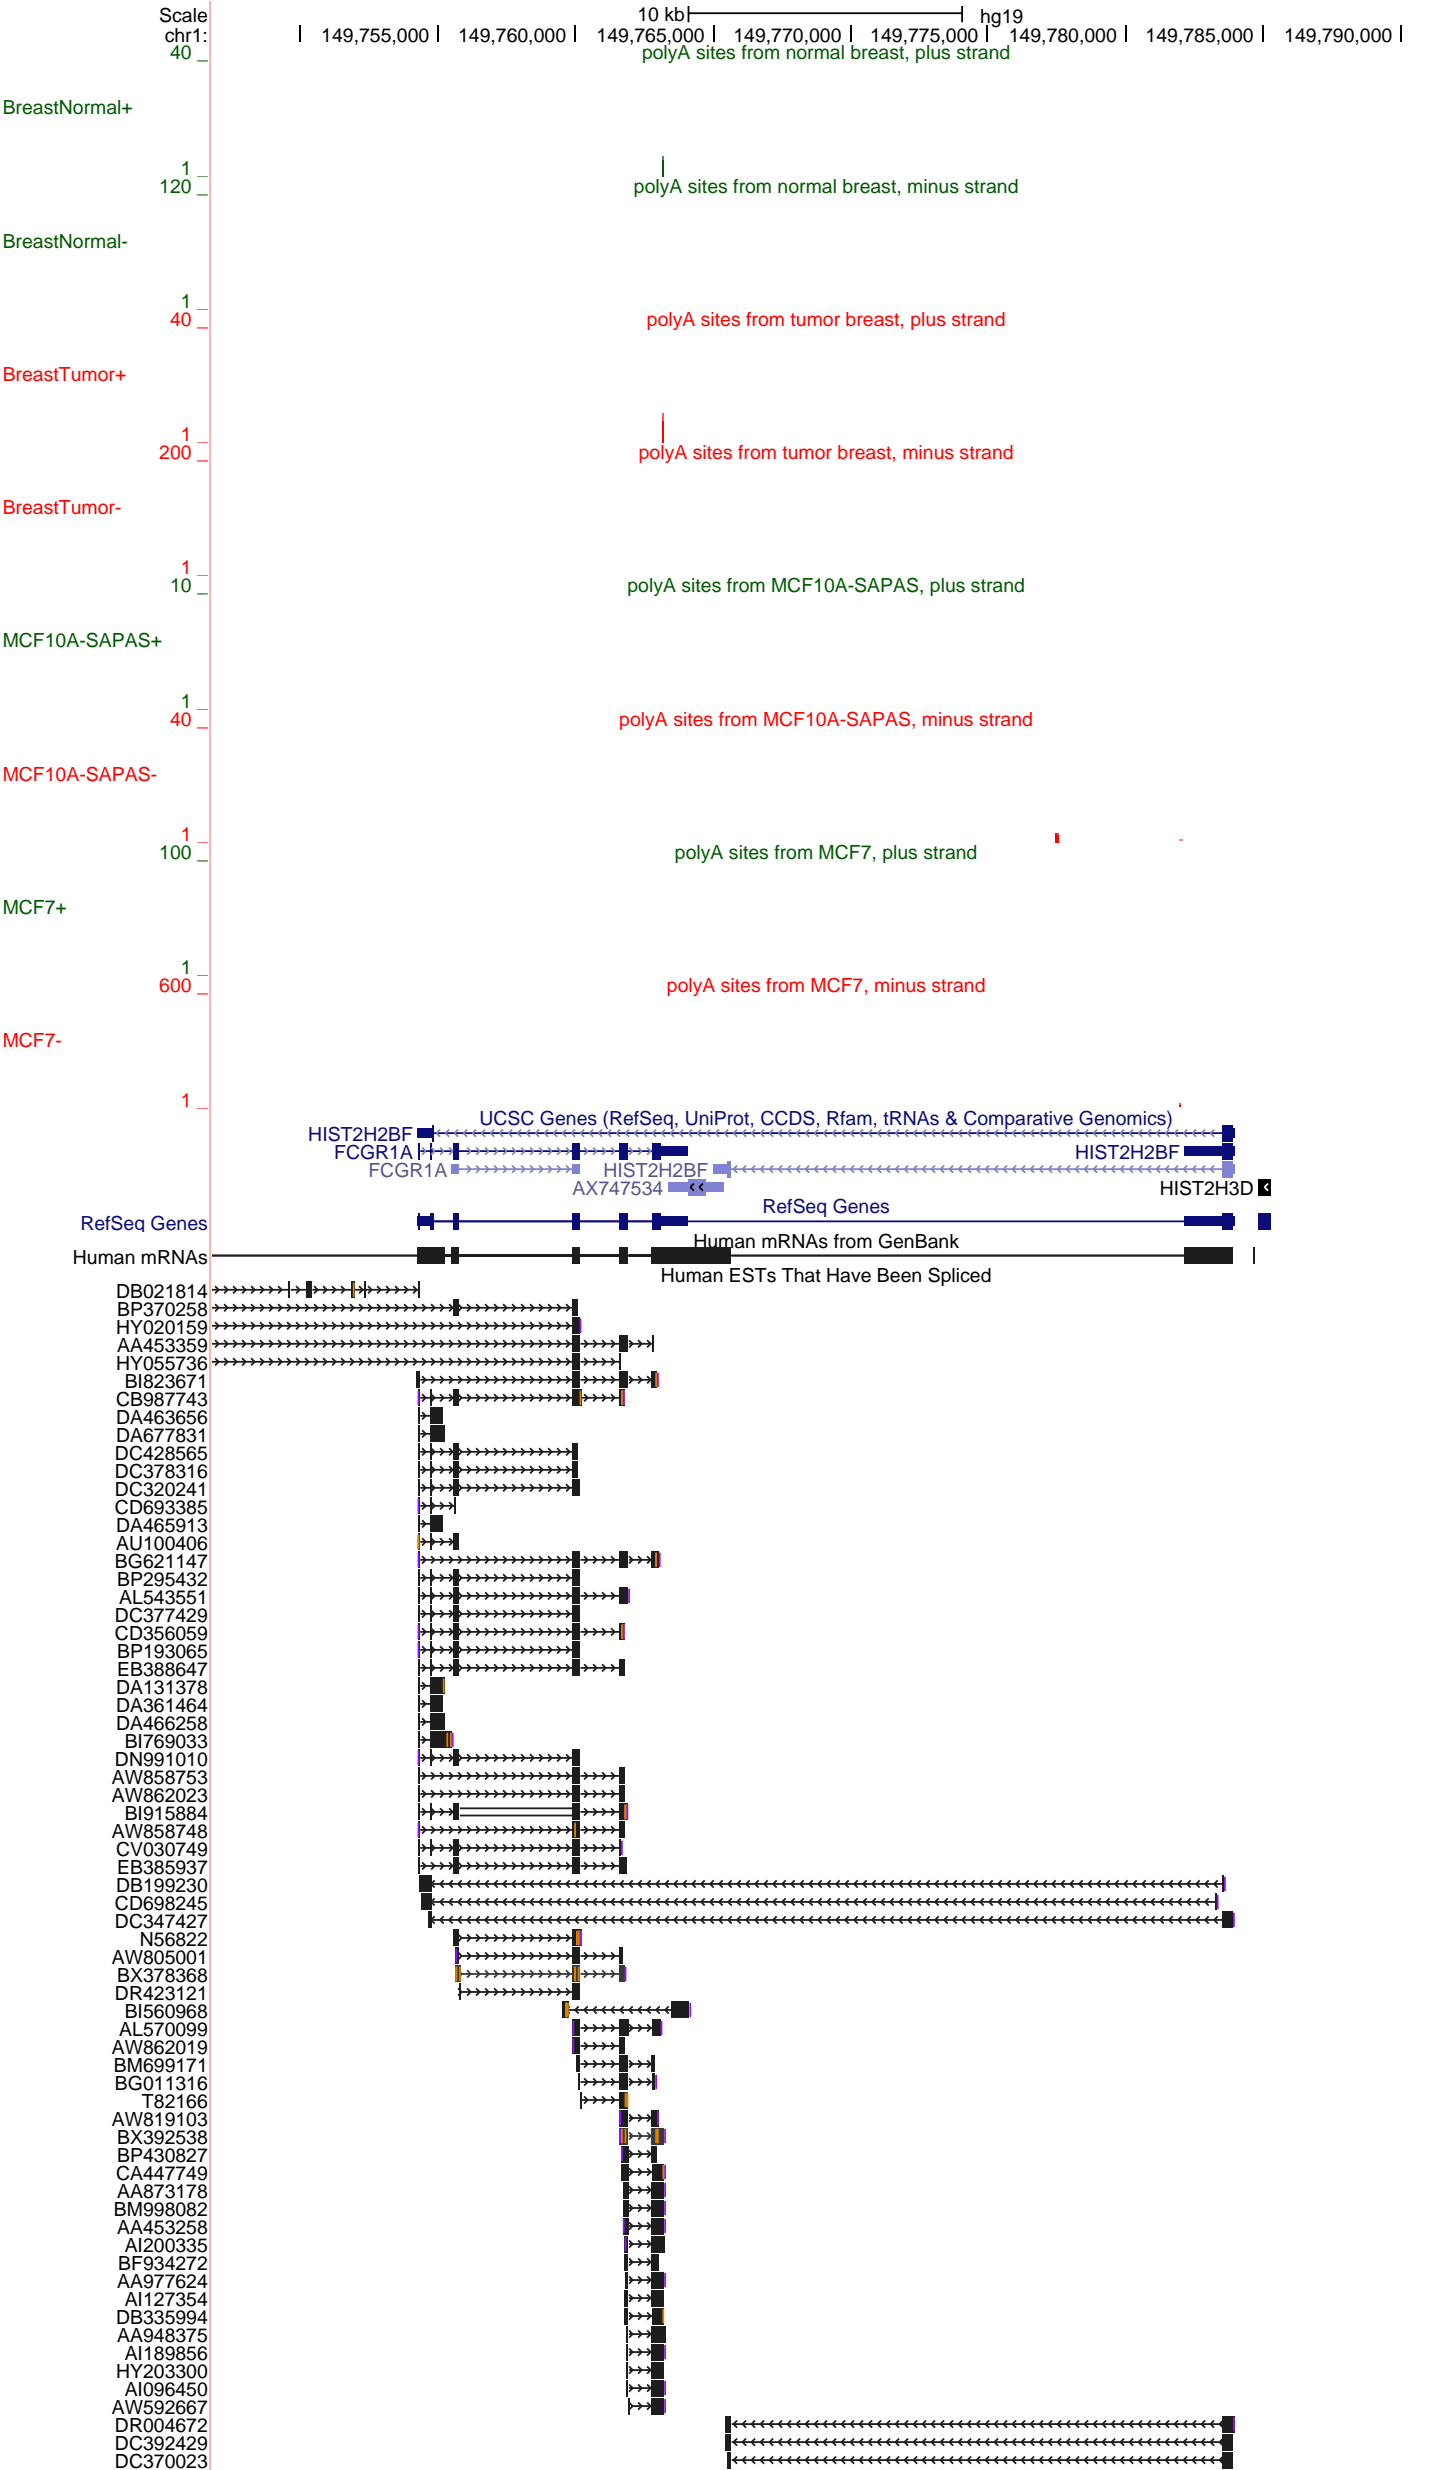

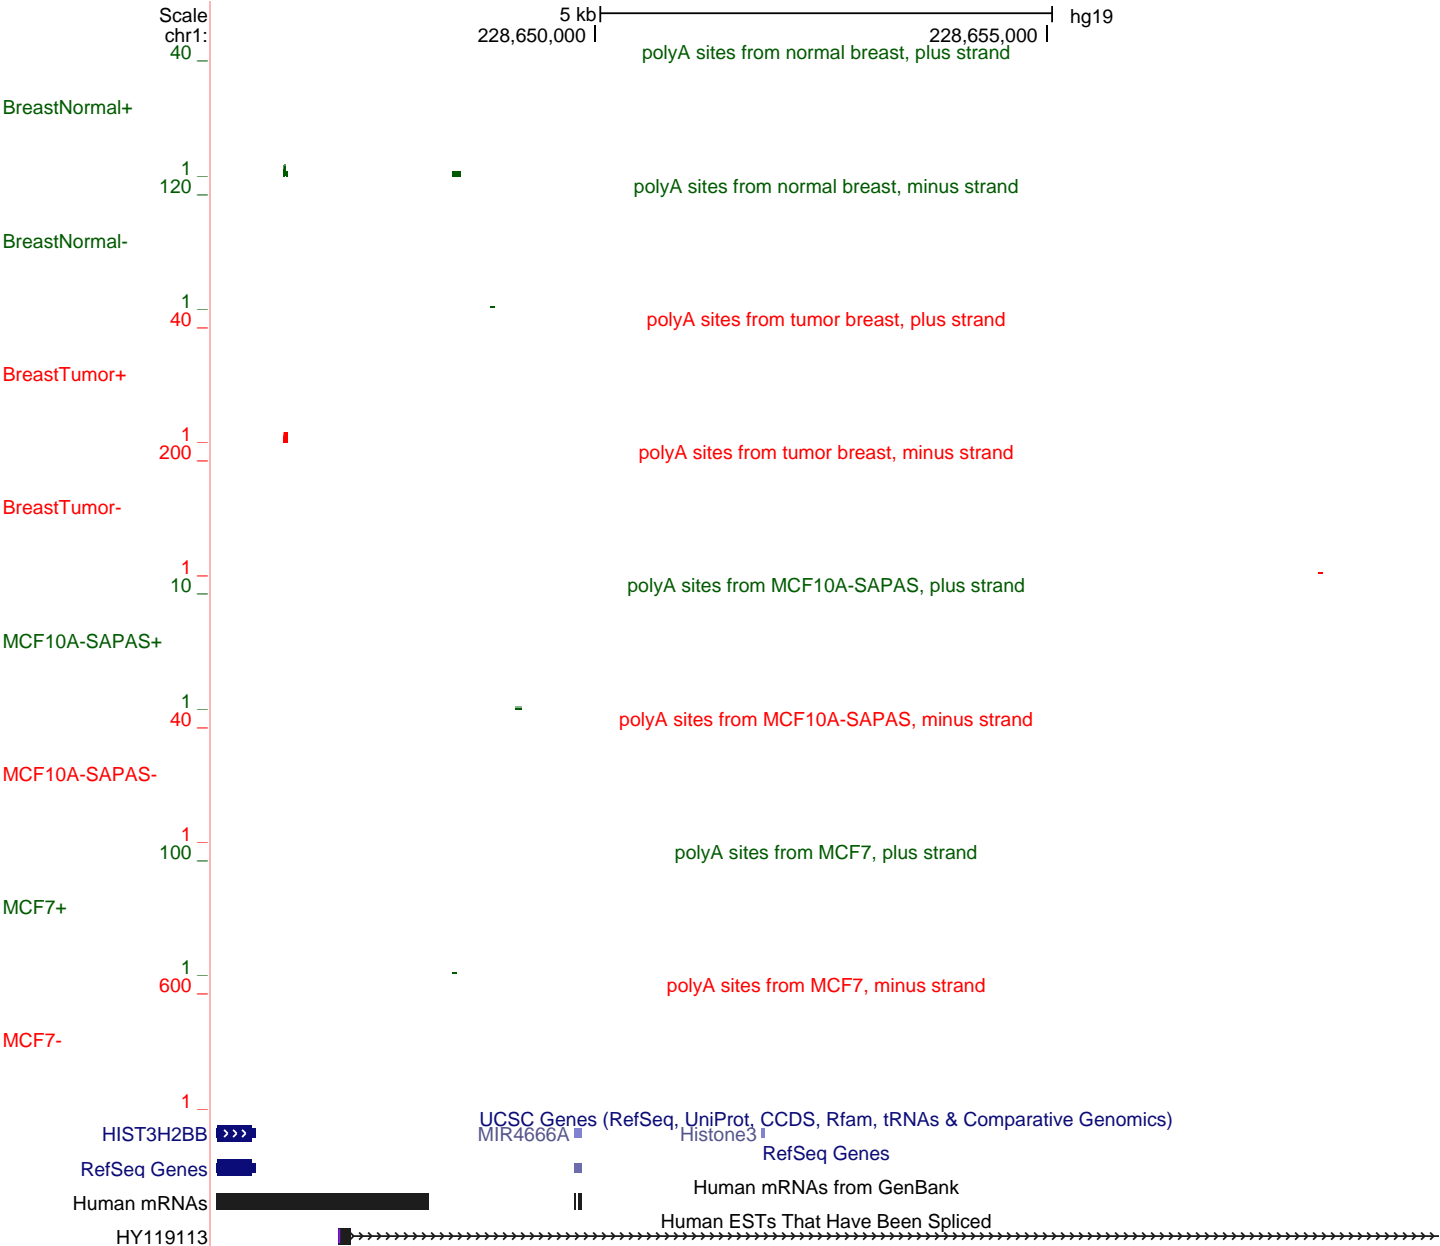

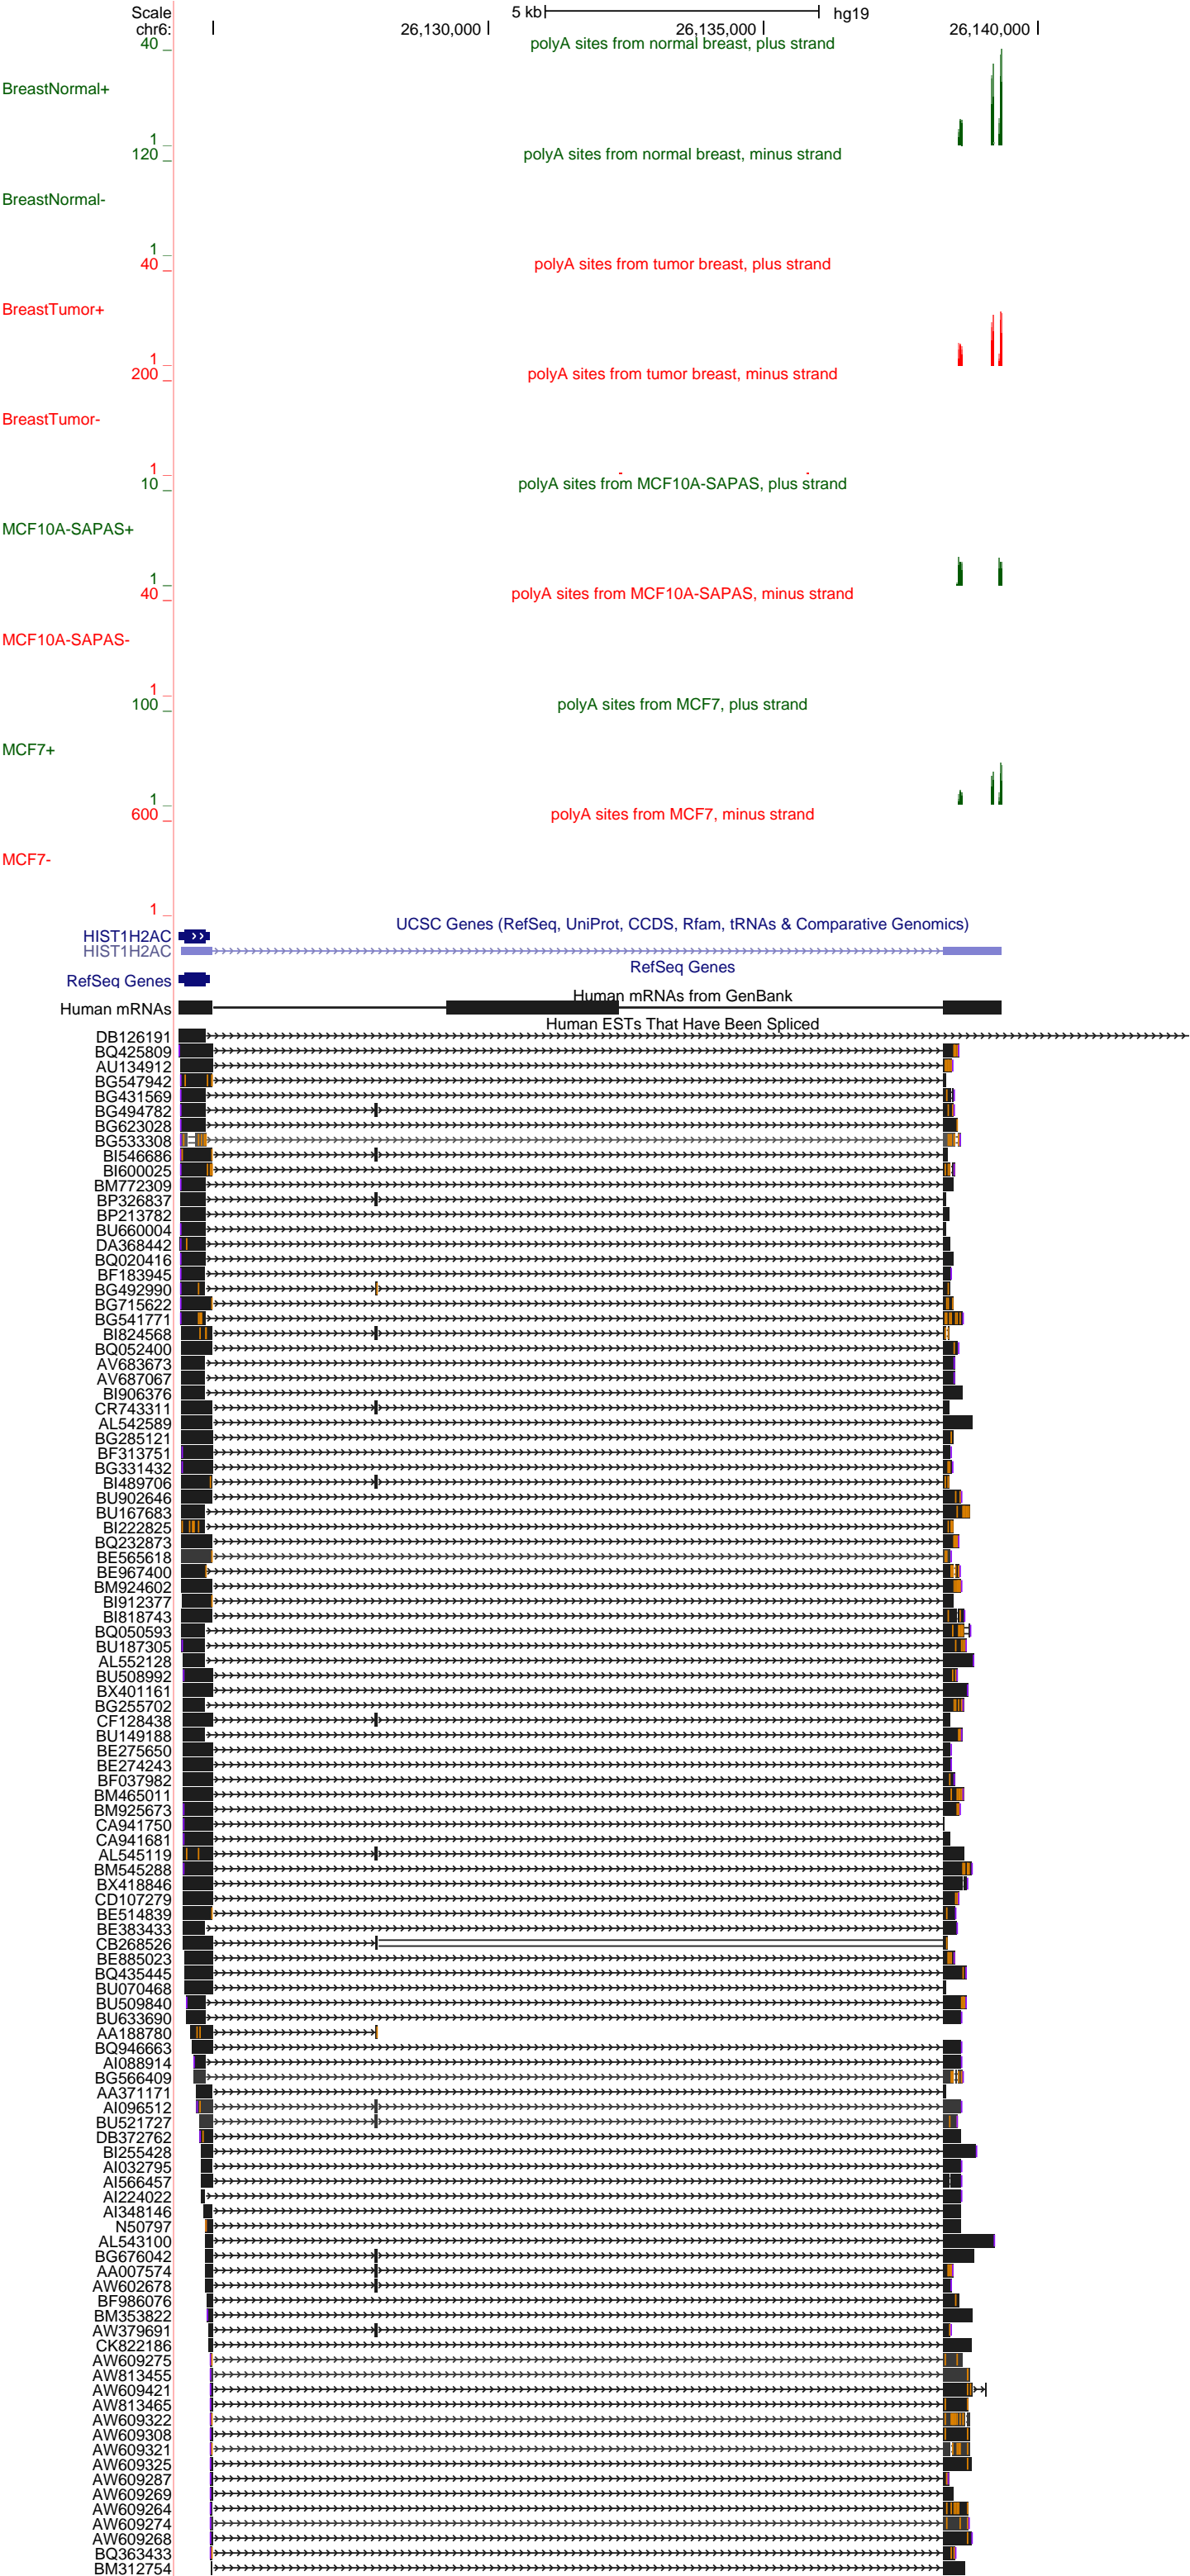

Supplement: pone.0063745.s003.pdf [file pone.0063745.s003.pdf]
